# Supplementary material
Source: PubMed Central journal article supplement (PMC10067337)
Supplement: NIHMS1879747-supplement-2.pdf [file NIHMS1879747-supplement-2.pdf]

|    | A      | B                                                        | C   | D   | E         | F       | G     | H              | I           | J            | K               | L   | M    | N    | O            | P                                                 | Q                                                                         | R                                                                                 | S    | T                                                                                            | U                        |
|----|--------|----------------------------------------------------------|-----|-----|-----------|---------|-------|----------------|-------------|--------------|-----------------|-----|------|------|--------------|---------------------------------------------------|---------------------------------------------------------------------------|-----------------------------------------------------------------------------------|------|----------------------------------------------------------------------------------------------|--------------------------|
| 1  | Number | Subject Category                                         | Age | Sex | Ethnicity | Normal? | IPAH? | # yrs. PAH Dx? | Fhx of PAH? | C-tissue dx? | CREST / Sclero? | HT? | ILD? | PAH? | # yrs. C Dxd | C Dxs                                             | Smoking Hx                                                                | PMHx                                                                              | HRT? | Meds                                                                                         | Height (m./Weight (lb.)) |
| 2  | 96     | SSc+ (+ILD, ANA/ACA+, HT+)<br>(repaired ASD)             | 50  | F   | NHW       | N       | N     | 3 N            | Y           | Y            | Y               | Y   | Y    | Y    | 10           | Ltd. SD,<br>RP                                    | Previous, 2 diff.<br>Dr. notes: one<br>says 10,<br>another 3 pack<br>yrs. | ILD, IBS, HP, UP,<br>HTN, GERD,<br>repaired ASD,<br>Afib, O, DM, HT               |      | B, Pred, F, C, Alb, E, Sp,<br>F/S, HH, R, Fen, Fel,<br>Levo, Si, Ser, Pe, Dig,<br>Est, KCl   | 62"/82.0kg               |
| 3  | 96-2   | SSc+ (+ILD, ANA/ACA+, HT+)<br>(repaired ASD) (duplicate) | 53  | F   | NHW       | N       | N     | 6 N            | Y           | Y            | Y               | Y   | Y    | Y    | 13           | Ltd. SSc,<br>RP                                   | Previous, 2 diff.<br>Dr. notes: one<br>says 10,<br>another 3 pack<br>yrs. | ILD, DM, HT, Afib,<br>Div, RHF, UP, LP,<br>IBS, repaired<br>ASD, GERD, Th,<br>HTN |      | B, S, Pred, O2, Alb, F/S,<br>F, C, Dig, KCl, Sp, PH,<br>HH, Iba, Me, Si, Ser, L,<br>Feno, O2 | 62"/77.1kg               |
| 4  | 111    | IPAH (PE)                                                | 46  | M   | NHW       | N       | Y     | 3 N            | N           | N            | N               | N   | N    | Y    |              |                                                   | Former smoker;<br>quit 1/1/03                                             | PE, GERD                                                                          |      | B, Zol, C, Doxy, Cy,<br>Mon, L                                                               |                          |
| 5  | 111-2  | IPAH (PE) (duplicate)                                    | 49  | M   | NHW       | N       | Y     | 6 N            | N           | N            | N               | N   | N    | Y    |              |                                                   | Former smoker;<br>quit 1/1/03                                             | PE, GERD, ARD,<br>As                                                              |      | S, B, C, Ac, Alb, Zol,<br>G/C, Cy, L                                                         |                          |
| 6  | 113    | sPAH (Sp, ANA+)                                          | 63  | F   | NHW       | N       | N     | 5 N            | N           | N            | N               | N   | N    | Y    |              |                                                   | None                                                                      | Sp, CAD, Scol,<br>Hep, GERD, App,<br>Sp                                           |      | Epop, B, O2, C, F, Ser,<br>KCl                                                               | 62"/63.5kg               |
| 7  | 113-2  | sPAH (Sp, ANA+) (duplicate)                              | 65  | F   | NHW       | N       | N     | 7 N            | N           | N            | N               | N   | N    | Y    |              |                                                   | None                                                                      | Sp, CAD, Scol,<br>Hep, GERD, App,<br>D, Div, Hys, IBS,<br>H, HL, OP, Ch           |      | Epop, S, B, O2, C, F, Dig,<br>KCl, Alp, Ser, Fe, Pan                                         | 62"/135#                 |
| 8  | 114    | SSc+ (HT+)                                               | 68  | F   | NHW       | N       | N     | 3 N            | Y           | Y            | Y               | N   | Y    |      | 7            | Ltd. SD,<br>CREST                                 | Until 1979; 6<br>cigarettes/day<br>for 15-20 yrs                          | CHF, GERD, HT,<br>CA                                                              |      | B, O2, Fe, Vc, VitE, VitA,<br>VitB, Esc, Ate, Acid,<br>Min, Est, L                           |                          |
| 9  | 114-2  | SSc+ (HT+) (duplicate)                                   | 71  | F   | NHW       | N       | N     | 5 N            | Y           | Y            | Y               | N   | Y    |      | 10           | Ltd. SSc,<br>RP, Tel                              | Until 1979; 6<br>cigarettes/day<br>for 15-20 yrs                          | CHF, GERD, HT,<br>CA                                                              |      | B, S, Dilt, O2, F, CQ10,<br>Fe, Levo, KCl, O,<br>Vita/B/C/D/E, Acid, Esc,<br>At, Min         | 66.5"; 152#<br>(3/23/09) |
| 10 | 135    | SLE, "mild" SD, MCTD?+ (ILD,<br>ANA+, HT+)               | 47  | F   | AA        | N       | N     | 5 N            | Y           | Y?           | Y               | Y   | Y    |      | 16           | RP, SLE,<br>"mild" SD,<br>MC?                     | Previous                                                                  | Peri, HP, ILD,<br>HTN, HT                                                         |      | Epop, Am, MM, O2, C,<br>F, Los, E, KCl, Sp, Levo                                             | 67/174                   |
| 11 | 135-2  | UCTD+ (ILD, ANA+, HT+)<br>(duplicate)                    | 52  | F   | AA        | N       | N     | 9 N            | Y           | N            | Y               | Y   | Y    |      | 20           | UCTD-<br>diffuse                                  | Previous                                                                  | Peri, HP, ILD,<br>HTN, HT                                                         |      | Epop, S, Am, O2, C, F,<br>Levo, Sp, KCl, O, Los, Pa                                          | 67/176                   |
| 12 | 160    | IPAH (ANA+)                                              | 57  | F   | NHW       | N       | Y     | <1             | N           | N            | N               | N   | N    | Y    |              |                                                   | None                                                                      | O, R, Ch, "very<br>mild" SA, HTN,<br>HP                                           |      | Esc, Estr, C                                                                                 | 69/196.2                 |
| 13 | 160-2  | IPAH (ANA+) (duplicate)                                  | 58  | F   | NHW       | N       | Y     | 1 N            | N           | N            | N               | N   | N    | Y    |              |                                                   | None                                                                      | O, R, Ch, "very<br>mild" SA, HTN,<br>HP                                           |      | S, Amb, C, F, Eze/Si, Flu                                                                    | 69/204.5                 |
| 14 | 165    | SSc+ (+ILD) (ANA+, RVVT+,<br>SSA+)                       | 64  | F   | NHW       | N       | N     | 13 N           | Y           | Y            | N               | Y   | Y    |      | 34           | Ltd SSc,<br>RP                                    | None                                                                      | ILD, GERD, BP, O,<br>CTED?, RVVT+,<br>aSSA+                                       |      | Ni, O2, F, C, Sp, Pan, M,<br>Ac/Co                                                           | 65/209                   |
| 15 | 165-2  | SSc+ (+ILD) (ANA+, RVVT+,<br>SSA+) (duplicate)           | 67  | F   | NHW       | N       | N     | 16 N           | Y           | Y            |                 | Y   | Y    |      | 36           | Ltd SSc,<br>RP                                    | None                                                                      | ILD, GERD, BP, O,<br>A, HT, Hyp,<br>CTED? (in some<br>notes)                      |      | S, O2, Dig, F, C, Pan, Sp,<br>Vd                                                             | 65/167.2                 |
| 16 | 167-2  | SSc+ (DVT) (duplicate)                                   | 54  | F   | NHW       | N       | N     | 4 N            | Y           | Y            | N               | N   | Y    |      | >12          | Diffuse<br>SSc<br>(melorheo<br>stotic<br>variant) | None                                                                      | PleuE, LC, GERD,<br>DVT, Ca, HvT, Ar                                              |      | Dilt, C, F, Sp, KCl, E,<br>Ca/Vd, Ale                                                        | 63/69.3kg                |

|    | A     | B                                              | C  | D | E   | F | G  | H   | I                              | J | K | L | M  | N | O   | P                                    | Q                                                             | R                                                             | S                                                        | T                                                                                    | U        |
|----|-------|------------------------------------------------|----|---|-----|---|----|-----|--------------------------------|---|---|---|----|---|-----|--------------------------------------|---------------------------------------------------------------|---------------------------------------------------------------|----------------------------------------------------------|--------------------------------------------------------------------------------------|----------|
| 17 | 167-3 | SSc+ (DVT) (duplicate) (*NO PAH per RHC today) | 58 | F | NHW | N | N  | 8   | N                              | Y | Y | N | N  | Y | >16 | Diffuse SSc (melorheostotic variant) | None                                                          | Os, GERD, RP, PleuE, DVT, Ca, HyT, Ar                         |                                                          | S, Dilt, E, F, KCl, Vc, CaCO/Vd, Sp, Zo, Fluo                                        | 63/128   |
| 18 | 185-2 | IPAH (PFO vs ASD?) (duplicate)                 | 34 | F | NHW | N | Y  | 34  | N                              | N | N | N | N  | Y |     | 0.125 pk/yr Hx, quit 1/1/91          | IS, IP, Hyp, LP, PFO vs ASD?                                  |                                                               | B, Oral T vs placebo, O2, C, L arg, Mo, MVI, Nore        | 62/150.4                                                                             |          |
| 19 | 185-3 | IPAH (+PFO/ASD, EMS, PE) (duplicate) (AXIS)    | 39 | F | NHW | N | Y  | 39  | N                              | N | N | N | N  | Y |     | 0.125 pk/yr Hx, quit 1/1/91          | EMS, CHF, HTN, PE, Derm, GL, PVC, Hyp, LP, D, HA, PFO vs ASD? |                                                               | Epop, B, S, Am, O2, F, C, L arg, Nore, Mo, Ac, MVI, Trav | 62/160                                                                               |          |
| 20 | 188   | IPAH (PFO, Gr/HT+)                             | 44 | F | NHW | N | Y  | 12  | N                              | N | N | Y | N? | Y |     | ~20 pk yr Hx                         | PFO, A, HT, Gr, AI, LP, HP                                    |                                                               | Epop, Pred, O2, Levo, Lor, MS, Pro                       | 71/145                                                                               |          |
| 21 | 188-2 | IPAH (PFO, Gr/HT+) (duplicate)                 | 44 | F | NHW | N | Y  | 13  | N                              | N | N | Y | N? | Y |     | ~20 pk yr Hx                         | PFO, A, HT, Gr, AI, LP                                        |                                                               | Epop, S, Pred, Levo, ABC, Lor, MS                        | 71/                                                                                  |          |
| 22 | 213   | FPAH (HT+)                                     | 53 | F | NHW | N | Y  | 14  | Y (2 sisters)                  | N | N | Y | N? | Y |     |                                      | HT, Ca, CLL, TCP                                              |                                                               | Epop, B, O2, C, F, Levo, MVI, Sp, Dig                    | 64"/55kg                                                                             |          |
| 23 | 213-2 | FPAH (HT+) (duplicate)                         | 55 | F | NHW | N | Y  | 16  | Y (2 sisters)                  | N | N | Y | N? | Y |     |                                      | HT, Ca, CLL, TCP                                              |                                                               | Epop, B, S, RTX, O2, C, F, Ca, Dig, N, Levo, MVI, Sp     | 64"/125#                                                                             |          |
| 24 | 239   | IPAH (ANA/ACA+, HT+, PF)                       | 61 | F | NHW | N | Y? | <1  | N                              | N | N | Y | N  | Y |     | None                                 | HTN, GERD, HT, O, PF                                          |                                                               | Epop, Li, Levo, ASA, Ra, Esz, Dip                        | 64/79.2kg                                                                            |          |
| 25 | 239-2 | IPAH (ANA/ACA+, HT+, PF) (duplicate)           | 63 | F | NHW | N | Y? | 3   | N                              | N | N | Y | N  | Y |     | None                                 | HTN, GERD, HT, O, PF, UM, R-L shunt                           |                                                               | Epop, S, O2, Alb, F, C, Levo, O, KCl, Sp, D/A, Esz       | 64.2/196.2                                                                           |          |
| 26 | 328   | IPAH vs CTD (ANA+, HT+)                        | 74 | F | NHW | N | Y  | 1   | N                              | N | N | Y | N  | Y |     | Poss. CTD?                           | Afib, SA?, HP, CHF, mild COPD, Hys, App, HT, HTN, Ton         |                                                               | C, Levo, M, Flox                                         |                                                                                      |          |
| 27 | 328-2 | IPAH vs CTD (ANA+ HT+) (duplicate)             | 74 | F | NHW | N | Y  | 1   | N                              | N | N | Y | N  | Y |     | Poss. CTD?                           | Afib, SA?, HP, CHF, mild COPD, Hys, App, HT, HTN, Ton         |                                                               | S, C, Levo, Flox, Dig, MVI                               |                                                                                      |          |
| 28 | 344   | IPAH (ANA+)                                    | 24 | F | NHW | N | Y  | <1  | cousin w/PAH, but due to heart | N | N | N | N  | Y |     |                                      | Previous; quit 1/1/04                                         |                                                               | Epop, C                                                  | 63/101.1                                                                             |          |
| 29 | 344-2 | IPAH (ANA+) (duplicate) (AXIS)                 | 29 | F | NHW | N | Y  | 5   | cousin w/PAH, but due to heart | N | N | N | N  | Y |     |                                      | Previous; quit 1/1/04                                         | Endo, MSSA                                                    | S, Tre (subQ), C                                         | 63/99.6                                                                              |          |
| 30 | 358   | IPAH? (poss. HHT, ANA+, HT+)                   | 51 | F | NHW | N | N  | 11  | N                              | N | N | Y | N  | Y |     | pos. ANA, Tel                        | very remote Hx                                                | CVA, Tel, possible HHT?, SVT, RP, HT, Ton                     |                                                          | Amb, C, Levo, Ra, Ni, Cy, Lo, Ca, Vd, MVI, VitB, Vc                                  |          |
| 31 | 358-2 | IPAH? (ANA+, HT+) (duplicate)                  | 57 | F | NHW | N | N  | 17  | N                              | N | N | Y | N  | Y |     | pos. ANA, Tel                        | very remote Hx                                                | CVA, Tel, possible HHT? (Osler-Weber-Rendu), SVT, RP, HT, Ton |                                                          | S, Amb, O2, F, C, Levo, Tra, Al, Bac, Ce, Dig, Doc, Ra, Aze, VitB, Vc, Ac, Ca/Vd, FA | 64/107.7 |
| 32 | 382   | IPAH                                           | 48 | F | NHW | N | Y  | 3.5 | N                              | N | N | N | N  | Y |     |                                      |                                                               | SA, O                                                         |                                                          | Ilo, B, O2, C, KCl, MVI, Tor, HC                                                     | 64/220   |
| 33 | 382-2 | IPAH (duplicate)                               | 48 | F | NHW | N | Y  | 4   | N                              | N | N | N | N  | Y |     |                                      |                                                               | SA, O                                                         |                                                          | T, S, O2, C, KCl, FO, Tor, HC, MVI                                                   | 64/214.7 |

|    | A     | B                                                        | C  | D | E   | F | G | H           | I | J | K | L | M                               | N             | O                      | P                                              | Q                                 | R                                                           | S | T                                                                                                            | U                      |
|----|-------|----------------------------------------------------------|----|---|-----|---|---|-------------|---|---|---|---|---------------------------------|---------------|------------------------|------------------------------------------------|-----------------------------------|-------------------------------------------------------------|---|--------------------------------------------------------------------------------------------------------------|------------------------|
| 34 | 396   | SSc+ (ANA+)                                              | 53 | M | HL  | N | N | <1          | N | Y | Y | Y | N                               | Y             | <1                     | Likely<br>lcSSc: RP,<br>sclerodact<br>yly, Tel | 7.5 pk/yr Hx;<br>quit 5 years ago | GERD, RP, HTN                                               |   | Ni, O2, C                                                                                                    | 62/120.8<br>(2/3/10)   |
| 35 | 396-2 | SSc+ (+ILD, ?CTEPH?) (ANA+)<br>(duplicate)               | 55 | M | HL  | N | N | 3           | N | Y | Y | Y | Y                               | Y             | 2.5                    | lcSSc: RP,<br>sclerodact<br>yly, Tel           | 7.5 pk/yr Hx;<br>quit 7 years ago | GERD, RP, HTN,<br>NSIP, HCV+, ?PE?                          |   | S, Ni, O2, F, C, O,<br>HC/AC, G, Vd                                                                          | 62/128.2               |
| 36 | 529   | IPAH (HT+)                                               | 30 | F | NHW | N | Y | ~1<br>month | N | N | N | Y | N                               | Y             |                        |                                                | None                              | HT, RP, 2:1 AV<br>block?                                    |   | 1 day of Veletri (RT<br>Epop), C, HCTZ, Levo,<br>Bup, Zol, Ce, Tr, Lor                                       | 64"/120.3#<br>(9/8/10) |
| 37 | 529-2 | IPAH (HT+) (duplicate) (AXIS)                            | 32 | F | NHW | N | Y | 2           | N | N | N | Y | N                               | Y             |                        |                                                | None                              | HT, RP, 2:1 AV<br>block?, SVT                               |   | RT Epop (Veletri), S,<br>Am, Sp, Levo, MgO, Ce,<br>Bup, Lor, M, Tr, C, Zol,<br>Ac                            | 64/122                 |
| 38 | 550-3 | IPAH? (+OSA) (duplicate) (AXIS)                          | 64 | F | NHW | N | Y | 4           | N | N | N | N | N                               | Y             |                        |                                                | None                              | SA, GERD, Al/At                                             |   | Amb, O2, CPAP, Alb,<br>CC, C, F, G, Mo, Mon,<br>Sp, Pan, Trav, Car,<br>CaCO, Aze, At, Ca/Vd,<br>Fex, MVI, Ac | 63/163                 |
| 39 | 550-4 | IPAH? (+OSA, LVDD?)<br>(duplicate) (AXIS f/u)            | 64 | F | NHW | N | Y | 4           | N | N | N | N | N                               | Y             |                        |                                                | None                              | SA, GERD, Al/At,<br>LVDD?                                   |   | Tad, Amb, C, F, Alb, At,<br>Aze, CC, CaP, Fex, Gu,<br>Mo, Mon, Pan, Sp, Trav,<br>MVI, Ac, NaCl               | 63/164.8               |
| 40 | 578   | SSc+ (ANA+, +ILD, HT, SA, CKD)                           | 54 | F | AA  | N | N | <1          | N | Y | Y | Y | Y                               | Y             | 10                     | Ltd SSc                                        | 2.5-5 yr pk Hx                    | CKD, HT, HTN, SA,<br>GERD, D, CTS,<br>Myo, Fib, DL          |   | O2, ASA, Ca, Erg, E, FeS,<br>Flu, F, G, Levo, Lor, KCl,<br>HH, Pred?                                         | 66/181<br>(11/30/11)   |
| 41 | 578-2 | SSc+ (ANA+, +ILD, HT, OSA,<br>CKD) (duplicate) (AXIS)    | 56 | F | AA  | N | N | 3           | N | Y | Y | Y | Y                               | Y             | 13                     | Ltd SSc                                        | 2.5-5 yr pk Hx                    | CKD/CRI, HT,<br>HTN, SA, GERD,<br>D, CTS, Myo, Fib,<br>DL   |   | S, Amb, Tr, Sp, Ser,<br>Levo, F, O2, Erg, E, FeS,<br>CaCO, Alp, Ac, Sen                                      | 66/138                 |
| 42 | 592   | SSc+ (ssSSc) (+COPD, ILD, O)<br>(ANA+, RNP+)             | 72 | F | NHW | N | N | <1          | N | Y | Y | N | Y -<br>"mild"<br>per Dr<br>note | Y             | 1                      | SSc sine<br>SD (ssSSc),<br>RP, Tel             | 80 pk/yr Hx;<br>quit 2/14/2000    | COPD/Em, GERD,<br>mild NSIP, small R<br>L interatrial shunt |   | O2, ASA, Ca/Vd, HCTZ,<br>M, O, TB, Form                                                                      | 63/175                 |
| 43 | 592-2 | SSc+ (ssSSc) (+COPD, ILD, O)<br>(ANA+, RNP+) (duplicate) | 75 | F | NHW | N | N | 2           | N | Y | Y | N | Y                               | Y             | 3                      | SSc sine<br>SD (ssSSc),<br>RP, Tel             | 80 pk/yr Hx;<br>quit 2/14/2000    | COPD/Em, GERD,<br>mild NSIP, small R<br>L interatrial shunt |   | Amb, Tad, O2, TB, F, M,<br>O, ASA, BS, Vd, Sp                                                                | 64/167.9               |
| 44 | 593   | IPAH                                                     | 25 | F | HL  | N | Y | 1           | N | N | N | N | N                               | Y             |                        |                                                | minor Hx                          | Mig, Ton                                                    |   | Epop, F, KCl, C, Tr                                                                                          | 65/178                 |
| 45 | 593-2 | IPAH (duplicate)                                         | 28 | F | HL  | N | Y | 4           | N | N | N | N | N                               | Y             |                        |                                                | minor Hx                          | Mig, Ton, TCP,<br>URI, ?small VSD?                          |   | Epop, S, Amb, O2, F, Sp,<br>C, Cita, Ac, KCl                                                                 | 65/144                 |
| 46 | 598   | sPAH (+AOSD, SP)                                         | 37 | F | NHW | N | N | 1           | N | N | N | N | N                               | Y             |                        |                                                | None                              | AOSD, SP,                                                   |   | Epop, MTX, Ana, Pred,<br>Ca/Mg/Zn, FA, MVI,<br>Oxy, Ca/Vd                                                    | 72/189                 |
| 47 | 598-2 | sPAH (+AOSD, SP, PVT)<br>(duplicate)                     | 38 | F | NHW | N | N | 1.5         | N | N | N | N | N                               | Y             |                        |                                                | None                              | AOSD, SO-JIA, SP,<br>PVT                                    |   | Epop, S, O2, Ca-Mg-Zn,<br>Vd, FA, MTX, Ana, Ce,<br>En, MTX, Pred, MVI, C,<br>Oxy                             | 72/184.8               |
| 48 | 687   | SSc+ (+OSA, (ANA/ACA+) (AXIS)                            | 78 | F | AA  | N | N | <1          | N | Y | Y | N | N                               | Y             | 1 (RP<br>~18<br>years) | SSc sine<br>SD (ssSSc),<br>RP, Tel             | None                              | SA, Alo, HTN,<br>Hyp, DDD, BP, N,<br>JP                     |   | Am, O2, Alb, HCTZ, Dip,<br>VitC, Ca/Vd, Li, Hydc,<br>FO, Fluor, MVI, VitE                                    | 64/169                 |
| 49 | 687-2 | SSc+ (+OSA, (ANA/ACA+) (duplicate) (AXIS f/u)            | 79 | F | AA  | N | N | <1          | N | Y | Y | N | N                               | Y             | 2 (RP<br>~19<br>years) | SSc sine<br>SD, RP                             | None                              | SA, Alo, HTN,<br>Hyp, DDD, BP, N,<br>JP, small HH           |   | S, Mac, Am, O2, CPAP,<br>Alb, Li, F/S, F, HC/AC,<br>Ben, Mu, Ca/Vd, KCl,<br>MVI, VitE, Om                    | 64/169.1               |
| 50 | 695   | IPAH (+OSA)                                              | 47 | F | HL  | N | Y | 3.5         | N | N | N | N | N?                              | (See<br>PFTs) | Y                      |                                                | None                              | SA, BP                                                      |   | T, Amb, O2, CPAP, G,<br>Me, Oxy, Lac, Tor, ASA,<br>KCl                                                       | 60/137.8               |

|    | A     | B                                          | C  | D | E   | F | G | H   | I | J | K | L | M        | N             | O | P                      | Q                             | R                                         | S                          | T                                                                                        | U            |
|----|-------|--------------------------------------------|----|---|-----|---|---|-----|---|---|---|---|----------|---------------|---|------------------------|-------------------------------|-------------------------------------------|----------------------------|------------------------------------------------------------------------------------------|--------------|
| 51 | 695-2 | IPAH (+OSA) (duplicate)                    | 48 | F | HL  | N | Y | 4.5 | N | N | N | N | N?       | (See<br>PFTs) | Y |                        | None                          | SA, BP, M                                 |                            | T (IV), S, Amb, O2,<br>CPAP, C, Tiz, Tor, Sp, G,<br>Me, Oxy, Dia, Lac, Lido,<br>KCl, ASA | 60/134.1     |
| 52 | 716   | sSc+ (+ILD?)                               | 65 | F | NHW | N | N | <1  | N | Y | Y | N | Y - mild | Y             |   | lcSSc, RP,<br>Tel, Cal | 40 yr/pk Hx;<br>quit 2006     | "mild" ILD, Noc<br>Hyp, App, Hys          | Estrace<br>for 24<br>years | Sp, ASA                                                                                  | 60.5/132     |
| 53 | 716-2 | sSc+ (+ILD?) (duplicate) (AXIS)            | 65 | F | NHW | N | N | <1  | N | Y | Y | N | Y - mild | Y             |   | lcSSc, RP,<br>Tel, Cal | 40 yr/pk Hx;<br>quit 2006     | "mild" ILD, Noc<br>Hyp, App, Hys          | Estrace<br>for 24<br>years | S, F, O2, Sp, ASA                                                                        | 60/133.7     |
| 54 | 792   | sPAH - PE (CTEPH? +Sar, SA)                | 40 | M | AA  | N | N | <1  | N | N | N | N | N        | Y             |   |                        | 37.5 pk/yr Hx;<br>quit 2/3/14 | PE, ?CTEPH?, Sar,<br>AKI, SA, HTN,<br>RAD |                            | Alb, BudF, F, C, Sim                                                                     | 70/201       |
| 55 | 792-2 | sPAH - PE (CTEPH? +Sar, SA)<br>(duplicate) | 41 | M | AA  | N | N | <1  | N | N | N | N | N        | Y             |   |                        | 37.5 pk/yr Hx;<br>quit 2/3/14 | PE, Sar, AKI, SA,<br>HTN, RAD             |                            | S, Alb, BudF, F, C, En,<br>Sim, I, ID                                                    | 177.8cm/207# |

|    | V                                              | W              | X                   | Y                              | Z              | AA                          | AB                  | AC                        | AD   | AE    | AF         | AG         | AH         | AI         | AJ     | AK            | AL         | AM         |
|----|------------------------------------------------|----------------|---------------------|--------------------------------|----------------|-----------------------------|---------------------|---------------------------|------|-------|------------|------------|------------|------------|--------|---------------|------------|------------|
| 1  | BMI (kg/m <sup>2</sup> )/BSA (m <sup>2</sup> ) | SpO2           | Date/Time Collected | Time Processed                 | D.O.D.         | Days B/T blood draw & death | Date of Initial RHC | Days B/T blood draw & RHC | RAP  | RVP   | PAPsys     | PAPdia     | PAPmean    | PVR (wood) | wedge  | CO            | CI         | PA Sat (%) |
| 2  | 33.1/                                          |                | 8/23/06; 14:15      | 0.6875                         | 5/10/10        | 1356                        | 37841               | 1111                      | 18   | 54/21 | 54         | 28         | 39         | 6.2        | 18     | 3.37          | 1.75       | 0.63       |
| 3  | 31.1/                                          |                | 3/25/09; 16:00      | 17:00 (CPT); 3/26 10:00 (EDTA) | 5/10/10        | 411                         | 37841               | 2056                      | 18   | 54/21 | 54         | 28         | 39         | 6.2        | 18     | 3.37          | 1.75       | 0.63       |
| 4  |                                                |                | 10/6/06; 14:00      |                                |                |                             | 37858               | 1138                      | 2    | 56/5  | 58; 51     | 28; 22     | 38; 32     | 7.6; 4.7   | 7; 7   | 4.1; 5.3      |            | 73%; 77%   |
| 5  |                                                |                | 7/8/09; 16:40       | 17:10 (CPT); 7/9 ~10:00 (EDTA) |                |                             | 37858               | 2144                      | 2    | 56/5  | 58; 51     | 28; 22     | 38; 32     | 7.6; 4.7   | 7; 7   | 4.1; 5.3      |            | 73%; 77%   |
| 6  | 25.6/                                          |                | 10/23/06; 14:30     |                                |                |                             | 37202               | 1811                      | 6    | 79    | 82; 73     | 26; 21     | 47; 44     |            | 9; 14  | 3.2           |            |            |
| 7  | 24.7/                                          |                | 1/22/09; 09:00      | 13:05 (CPT); froze EDTA cells  |                |                             | 37202               | 2633                      | 6    | 79    | 82; 73     | 26; 21     | 47; 44     |            | 9; 14  | 3.2           |            |            |
| 8  |                                                |                | 10/23/06; 15:50     |                                | 11/9/10        | 1478                        | 38014               | 999                       | 1    | 48/2  | 45; 43     | 21; 23     | 32; 30     | 8.2; 6.8   | 4; 2   | 3.4; 4.14     |            | 0.627      |
| 9  | 24.17/1.79 (3/23/09)                           |                | 2/24/09; 16:24      | 0.704861111                    | 11/9/10        | 623                         | 38014               | 1854                      | 1    | 48/2  | 45; 43     | 21; 23     | 32; 30     | 8.2; 6.8   | 4; 2   | 3.4; 4.14     |            | 0.627      |
| 10 |                                                |                | 1/3/07; 15:20       |                                |                |                             | 37558               | 1528                      | 5; 3 | 80/5  | 84; 71     | 30; 29     | 50; 46     | 5.8; 4.6   | 6; 5   | 7.53; 8.97    | 4.16; 4.95 |            |
| 11 | 27.55/1.8                                      |                | 8/12/11; 14:30      | 17:13 (CPT only)               |                |                             | 37558               | 3209                      | 5; 3 | 80/5  | 84; 71     | 30; 29     | 50; 46     | 5.8; 4.6   | 6; 5   | 7.53; 8.97    | 4.16; 4.95 |            |
| 12 | 28.97/2.0                                      |                | 2/28/07; 15:18*     |                                |                |                             | 39037               | 104                       | 6; 5 | 65/-1 | 65; 42     | 18; 10     | 35; 24     | 8.5        | 7; ?   | 3.31; 3.63    | 1.62       | 62%; 74%   |
| 13 | 30.2/                                          |                | 1/9/08; ??          |                                |                |                             | 39037               | 429                       | 6; 5 | 65/-1 | 65; 42     | 18; 10     | 35; 24     | 8.5        | 7; ?   | 3.31; 3.63    | 1.62       | 62%; 74%   |
| 14 |                                                | 96% on 5LPM O2 | 5/2/07; 15:45       |                                | 9/26/11 (SSDI) | 1608                        | 34618               | 4586                      | 6; 4 | 50/0  | 47; 49; 40 | 19; 17; 18 | 32; 31; 25 | 4.5; 2.7;  | 14; 17 | 4.7; 6.8; 4.5 | 2.34; 3.39 | 68.7%; 81% |
| 15 | 27.9/1.83                                      | 96% on 8LPM O2 | 3/17/10; 13:55      | 16:00 (CPT only)               | 9/26/11 (SSDI) | 558                         | 34618               | 5636                      | 6; 4 | 50/0  | 47; 49; 40 | 19; 17; 18 | 32; 31; 25 | 4.5; 2.7;  | 14; 17 | 4.7; 6.8; 4.5 | 2.34; 3.39 | 68.7%; 81% |
| 16 | ?/1.7                                          | 0.97           | 5/7/08; 14:50       |                                |                |                             | 38190               | 1385                      | 8; 8 | 45/6  | 44; 35     | 19; 16     | 30; 24     | 3; 1.9     | 11; 14 | 6.37; 5.3     | 3.57; 2.98 | 0.76       |

|    | V         | W                    | X                | Y                                                    | Z                 | AA                                   | AB                                                        | AC    | AD     | AE     | AF     | AG       | AH     | AI         | AJ         | AK         | AL         | AM         |          |
|----|-----------|----------------------|------------------|------------------------------------------------------|-------------------|--------------------------------------|-----------------------------------------------------------|-------|--------|--------|--------|----------|--------|------------|------------|------------|------------|------------|----------|
| 17 | 22.7/     | 0.96                 | 4/17/12; 8:45    | 12:00 (CPT); 4/18<br>10:30 (EDTA)                    |                   | Most<br>recent<br>contact<br>9/10/17 | 38190                                                     | 2826  | 8; 8   | 45/6   | 44; 35 | 19; 16   | 30; 24 | 3; 1.9     | 11; 14     | 6.37; 5.3  | 3.57; 2.98 | 0.76       |          |
| 18 | 27.5/     | 88% on<br>6LPM<br>O2 | 4/23/08; 14:30   |                                                      |                   |                                      | 4/6/2004 (NOT<br>initial RHC, but<br>earliest in records) | 1478  | 6      | 122/14 | 110    | 58       | 79     | 30.4       | 6          | 2.4        | 1.46       |            |          |
| 19 | 29.3/     | 80% on<br>8LPM<br>O2 | 6/12/13; 16:36   | 17:00 (CPT); 18:00<br>(serum); 6/13<br>~10:00 (EDTA) |                   |                                      | 4/6/2004 (NOT<br>initial RHC, but<br>earliest in records) | 3354  | 6      | 122/14 | 110    | 58       | 79     | 30.4       | 6          | 2.4        | 1.46       |            |          |
| 20 |           |                      | 10/19/07; 14:55  |                                                      |                   |                                      | date? From Dr<br>notes                                    |       | 5      |        | 90     | 44       | 63; 59 | 14.5       | 5          | 4.2        |            |            |          |
| 21 |           |                      | 4/9/08; 14:45    |                                                      |                   | Most<br>recent<br>contact<br>9/25/17 | date? From Dr<br>notes                                    |       | 5      |        | 90     | 44       | 63; 59 | 14.5       | 5          | 4.2        |            |            |          |
| 22 | 20.8/     |                      | 3/25/08; 16:00   |                                                      | 2/21/12<br>(SSDI) | 1426                                 | date? (Data per<br>WdS; not in e-<br>record)              | ?     | 10; 10 |        | 67; 55 | 34; 29   | 44; 37 | 16.4; 8.86 | 1; 7       | 2.7; 3.4   | 1.6; 2     |            |          |
| 23 | 21.5/1.6  |                      | 11/10/10; ~15:30 | 17:40 (CPT); 11/11<br>09:00 (EDTA)                   | 2/21/12<br>(SSDI) | 466                                  | date? (Data per<br>WdS; not in e-<br>record)              | ?     | 10; 10 |        | 67; 55 | 34; 29   | 44; 37 | 16.4; 8.86 | 1; 7       | 2.7; 3.4   | 1.6; 2     |            |          |
| 24 | 29.8/1.9  |                      | 5/14/08; 16:57   |                                                      | 1/27/12           | 1353                                 |                                                           | 39527 | 55     | 14; 13 | 86/11  | 89; 84   | 43; 44 | 60; 59     | 21.9       | 9; 6       | 2.33; 2.17 | 1.23; 1.14 | 0.516    |
| 25 | 33.5/2.0  |                      | 2/2/11; ~09:15   | 11:15 (CPT); EDTA<br>not done                        | 1/27/12           | 359                                  |                                                           | 39527 | 1049   | 14; 13 | 86/11  | 89; 84   | 43; 44 | 60; 59     | 21.9       | 9; 6       | 2.33; 2.17 | 1.23; 1.14 | 0.516    |
| 26 |           |                      | 2/19/09; ~12:30  | 0.604166667                                          | 2/4/14            | 1811                                 |                                                           | 39863 | 0      | 5; 5   | 78/7   | 80; 64   | 29; 25 | 46; 41     | 13.9; 10.5 | 14; 15     | 2.3; 2.47  | 1.45; 1.56 | 51%; 69% |
| 27 |           |                      | 5/27/09; 13:30?  | ~17:30 (CPT); 5/28<br>09:00 (EDTA)                   | 2/4/14            | 1714                                 |                                                           | 39863 | 97     | 5; 5   | 78/7   | 80; 64   | 29; 25 | 46; 41     | 13.9; 10.5 | 14; 15     | 2.3; 2.47  | 1.45; 1.56 | 51%; 69% |
| 28 |           | 98% on<br>RA         | 6/17/09; ~13:30  | 16:15 (CPT); 6/18<br>10:00 (EDTA)                    |                   |                                      | 3/4/09 (at UNM<br>Hospital)                               | 105   |        | 12     | 124/3  | 124; 101 | 57; 46 | 82; 66     | 25; 16     | 27         | 2.3; 2.57  | 1.51; 1.69 | 64%; 66% |
| 29 | 17.65/    | 97% on<br>RA         | 5/29/14; 08:24   | 08:58 (2 CPT); 11:00<br>(serum); 11:45<br>(EDTA)     |                   |                                      | 3/4/09 (at UNM<br>Hospital)                               | 1912  |        | 12     | 124/3  | 124; 101 | 57; 46 | 82; 66     | 25; 16     | 27         | 2.3; 2.57  | 1.51; 1.69 | 64%; 66% |
| 30 |           |                      | 8/17/09; 15:22   | 17:15 (CPT); 8/18<br>09:00 (EDTA)                    |                   |                                      | 9/28/2006 (if<br>previous cath, not<br>in e-record)       | 1054  | 1; 5   | 86/4   | 87; 66 | 29; 23   | 51; 39 | 12.7; 9.9  | 2; 6       | 3.87; 3.33 |            |            |          |
| 31 | 18.46/    | 0.94                 | 6/15/15; 13:41   | 13:56 (CPT); 14:49<br>(serum); 6/16 12:10<br>(EDTA)  |                   |                                      | 9/28/2006 (if<br>previous cath, not<br>in e-record)       | 3182  | 1; 5   | 86/4   | 87; 66 | 29; 23   | 51; 39 | 12.7; 9.9  | 2; 6       | 3.87; 3.33 |            |            |          |
| 32 | 37.8/2.04 |                      | 12/10/09; 10:00  | 10:45 (CPT); 12:15<br>(EDTA)                         | 8/12/13           | 1341                                 | 12/28/2006 (PSL)                                          | 1078  |        | 13     |        | 84       | 34     |            | 13         | 4.89       | 2.23       | 0.58       |          |
| 33 | 36.9/2.02 |                      | 4/14/10; 13:42   | 16:50 (CPT); 4/15<br>~10:00 (EDTA)                   | 8/12/13           | 1216                                 | 12/28/2006 (PSL)                                          | 1203  |        | 13     |        | 84       | 34     |            | 13         | 4.89       | 2.23       | 0.58       |          |

|    | V                     | W                                        | X               | Y                                                         | Z       | AA   | AB                                          | AC    | AD     | AE              | AF     | AG     | AH         | AI           | AJ     | AK         | AL         | AM       |
|----|-----------------------|------------------------------------------|-----------------|-----------------------------------------------------------|---------|------|---------------------------------------------|-------|--------|-----------------|--------|--------|------------|--------------|--------|------------|------------|----------|
| 34 | 22.4/1.55<br>(2/3/10) | 98% on<br>? O2                           | 2/25/10; 11:45  | 14:50 (CPT); 2/26<br>~10:00 (EDTA-flow)                   |         |      | 40234                                       | 0     | 1; 0   | 62/1            | 64; 55 | 22; 20 | 38; 35; 33 | 10.6; 7.65   | 1; 5   | 3.49; 3.66 | 2.27; 2.38 | 0.64     |
| 35 | 23.45/                | 91% on<br>2LPM<br>O2                     | 6/13/12; 16:34  | 17:10 (CPT); 6/14                                         |         |      | 40234                                       | 839   | 1; 0   | 62/1            | 64; 55 | 22; 20 | 38; 35; 33 | 10.6; 7.65   | 1; 5   | 3.49; 3.66 | 2.27; 2.38 | 0.64     |
| 36 | 20.6/1.58<br>(9/8/10) |                                          | 9/21/10; 14:50  | 17:35 (CPT); 9/22<br>10:30 (EDTA)                         |         |      | 8/23/2010 @?<br>(numbers from Dr.<br>notes) | 29    | 4      | 73/7            | 75     | 34     | 52; 33     | 9.4; 6.3     | 6      | 4.9        |            |          |
| 37 | 20.9/                 | 93% on<br>RA                             | 10/26/12; 12:19 | 13:15 (2xCPT<br>uptake & plasma);<br>15:40 (EDTA)         |         |      | 8/23/2010 @?<br>(numbers from Dr.<br>notes) | 795   | 4      | 73/7            | 75     | 34     | 52; 33     | 9.4; 6.3     | 6      | 4.9        |            |          |
| 38 | 28.88/                | 98% on<br>2LPM<br>O2                     | 10/22/14; 12:33 | 12:56 (2 CPT); 14:40<br>(serum); 13:57<br>(EDTA)          |         |      | 11/2010 per Dr<br>notes                     | ~1451 |        |                 | 163    | 55     | 96         |              |        |            |            |          |
| 39 | 29.2/                 |                                          | 1/14/15; 14:00  | 14:41 (CPT); 15:20<br>(serum); 1/15 09:45<br>(EDTA)       |         |      | 11/2010 per Dr<br>notes                     | ~1535 |        |                 | 163    | 55     | 96         |              |        |            |            |          |
| 40 | 29.3/1.9              | 96%<br>(11/18/<br>11)                    | 11/3/11; 09:05  | 12:15 (CPT); 11/4<br>11:00 (EDTA)                         | 6/20/15 | 1325 | 40850                                       | 0     | 10; 10 | 73/5            | 75; 76 | 34; 31 | 50; 47     | 15.99; 11.68 | 3; 4   | 2.94; 3.68 | 1.56; 1.95 | 58%; 64% |
| 41 | 22.28/                | 0.94                                     | 4/10/14; 14:28  | 10:00 (CPT); ~11:00<br>(serum); EDTA not<br>processed!    | 6/20/15 | 436  | 40850                                       | 889   | 10; 10 | 73/5            | 75; 76 | 34; 31 | 50; 47     | 15.99; 11.68 | 3; 4   | 2.94; 3.68 | 1.56; 1.95 | 58%; 64% |
| 42 | 31.1/                 | 92%<br>(on 2L<br>O2?)                    | 2/14/12; 10:45  | 12:20 (CPT); 2/15<br>09:30 (EDTA)                         |         |      | 40953                                       | 0     | 10; 11 | 88/14           | 88; 79 | 33; 32 | 54; 51     | 9.3; 9.02    | 12; 13 | 3.44       | 1.88       | 69%; 69% |
| 43 | 28.81/                | N/D<br>this<br>visit                     | 3/26/14; 14:15  | 16:37 (CPT only)                                          |         |      | 40953                                       | 771   | 10; 11 | 88/14           | 88; 79 | 33; 32 | 54; 51     | 9.3; 9.02    | 12; 13 | 3.44       | 1.88       | 69%; 69% |
| 44 | 29.6/                 | @rest,<br>90%<br>w/activ<br>ity;<br>both | 3/5/12; 16:30   | 16:55 (CPT) – EDTA<br>not processed!                      |         |      | 40506                                       | 467   | 10; 8  | 91/13;<br>88/10 | 92; 92 | 50; 47 | 67; 65     | 18.52; 20.34 | 7; 6   | 3.24; 2.9  | 1.71; 1.53 | 60%; 66% |
| 45 | 23.96/                | @rest,<br>86%<br>w/activ<br>ity;<br>both | 11/3/14; 15:48  | 16:14 (CPT); 17:06<br>(serum); (EDTA)                     |         |      | 40506                                       | 1440  | 10; 8  | 91/13;<br>88/10 | 92; 92 | 50; 47 | 67; 65     | 18.52; 20.34 | 7; 6   | 3.24; 2.9  | 1.71; 1.53 | 60%; 66% |
| 46 | 25.6/                 | 0.91                                     | 3/22/12; 10:20  | 12:25 (CPT); 13:00<br>(EDTA)                              | 7/27/17 | 1953 | 40575                                       | 415   | 9      | 80/8            | 85     | 32     | 50         | 8.1          | 9      | 5.06       | 3.61       | 0.52     |
| 47 | 25.08/                | 0.92                                     | 6/14/12; 8:40   | 11:40 (CPT); EDTA<br>not processed<br>(Extreme hemolysis) | 7/27/17 | 1869 | 40575                                       | 499   | 9      | 80/8            | 85     | 32     | 50         | 8.1          | 9      | 5.06       | 3.61       | 0.52     |
| 48 | 29.1/                 | 88% on<br>RA                             | 3/7/13; 08:46   | 10:42 (CPT); 12:24<br>(serum)                             |         |      | 41340                                       | 0     | 8; 8   | 63/8            | 61; 61 | 21; 23 | 38; 40     | 4.05; 4.03   | 13; 16 | 6.17; 5.96 | 3.39; 3.27 | 76%; 78% |
| 49 | 29/                   | @rest,<br>90%<br>w/activ<br>ity;<br>both | 1/8/14; 15:44   | 16:30 (CPT only)                                          |         |      | 41340                                       | 307   | 8; 8   | 63/8            | 61; 61 | 21; 23 | 38; 40     | 4.05; 4.03   | 13; 16 | 6.17; 5.96 | 3.39; 3.27 | 76%; 78% |
| 50 | 26.9/                 | 92% on<br>3LPM<br>O2                     | 4/3/13; 13:56   | 15:00 (CPT); 16:00<br>(serum); 4/4 9:20<br>(EDTA)         | 8/27/16 | 1242 | 12/24/09<br>@Swedish MC                     | 1196  |        |                 | 96     | 45     | 58         | 38?          |        |            |            |          |

|    | V     | W                           | X              | Y                                              | Z       | AA                          | AB                                                      | AC   | AD     | AE   | AF     | AG     | AH     | AI         | AJ     | AK         | AL         | AM       |
|----|-------|-----------------------------|----------------|------------------------------------------------|---------|-----------------------------|---------------------------------------------------------|------|--------|------|--------|--------|--------|------------|--------|------------|------------|----------|
| 51 | 26.2/ | w/activity, 97% @rest; both | 6/4/14; 14:09  | 14:55 (CPT); 15:44 (serum); 6/5 (EDTA)         | 8/27/16 | 815                         | 12/24/09 @Swedish MC                                    | 1623 |        |      | 96     | 45     | 58     |            | 38?    |            |            |          |
| 52 | 25.4/ | w/activity, 95% @rest, both | 7/31/13; 14:50 | 15:13 (CPT); 16:00 (serum)                     |         |                             | 6/20/13 @Denver Health MC                               | 41   | 10     | 76/2 | 81     | 34     | 52     | 14.5       | 9      | 2.9        | 1.83       | 0.61     |
| 53 | 26.2/ | 97% on RA                   | 8/22/13; 11:50 | 13:10 (CPT); ~13:50 (serum); 8/23 09:00 (EDTA) |         |                             | 6/20/13 @Denver Health MC                               | 63   | 10     | 76/2 | 81     | 34     | 52     | 14.5       | 9      | 2.9        | 1.83       | 0.61     |
| 54 | 28.84 | 0.99                        | 7/24/14; 09:40 | 10:48 (CPT); 13:02 (serum); 7/25 14:00 (EDTA)  |         |                             | Possible initial RHC @Cheyenne VA, but not in Epic      |      |        |      |        |        |        |            |        |            |            |          |
| 55 | 29.8/ | @rest, 94% w/activity; both | 1/21/15; 13:25 | 15:20 (CPT); 15:50 (serum); 1/22 08:15 (EDTA)  |         | Most recent contact 8/30/17 | 7/24/14 (Poss. Init. RHC @Cheyenne VA, but not in Epic) | 181  | 14; 11 | 56/4 | 63; 54 | 23; 25 | 43; 38 | 8.17; 5.86 | 14; 15 | 3.55; 3.91 | 1.68; 1.85 | 59%; 66% |



|    | AN                                     | AO                                   | AP                         | AQ    | AR    | AS       | AT       | AU        | AV       | AW      | AX        | AY         | AZ           | BA                  | BB                                      | BC                         | BD   |
|----|----------------------------------------|--------------------------------------|----------------------------|-------|-------|----------|----------|-----------|----------|---------|-----------|------------|--------------|---------------------|-----------------------------------------|----------------------------|------|
| 1  | Vasoresponsive?                        | RHC Date r                           | Days B/T blood draw & RHCZ | RAP r | RVP r | PAPsys r | PAPdia r | PAPmean r | PVR r    | wedge r | CO r      | CI r       | PA Sat (% )3 | Vasoresponsive? R   | Date of PFTs                            | Days B/T blood draw & PFTs | FVC  |
| 2  |                                        | 37931                                | 1021                       | 5; 9  | 55/7  | 57; 55   | 21; 23   | 36; 35    | 3.9; 3.3 | 8; 9    | 7.2; 7.97 | 3.86; 4.27 | 74%; 79%     | N (PGI2)            | 9/20/2004 (from paper record)           | 702                        | 1.91 |
| 3  |                                        | 40239                                | 342                        | 19    | 73/9  | 76       | 28       | 46        | 7.26     | 15      | 4.27      | 2.56       | 0.57         | (N on previous RHC) | 1/16/08; Crit. Care & Pulm. Consultants | 434                        | 1.62 |
| 4  | N (PGI2)                               |                                      |                            |       |       |          |          |           |          |         |           |            |              |                     | No PFTs in e-record                     |                            |      |
| 5  | N (PGI2)                               | 2/25/09 at Cheyenne Regional Med Ctr | 133                        | 1     | 63/1  | 67       | 29       | 45        | 7.5      | 6       | 6.7       | 2.6        |              |                     | No PFTs in e-record                     |                            |      |
| 6  | N                                      | 37645                                | 1368                       | 9     | 82/13 | 83       | 33       | 51        | 14.3     | 8       | 3         |            | 0.646        |                     | No PFTs in e-record                     |                            |      |
| 7  | N                                      | 39835                                | 0                          | 1     | 74/23 | 73       | 24       | 43        | 12.1     | 3       | 3.3       | 2.08       | 0.68         |                     | No PFTs in e-record                     |                            |      |
| 8  | N                                      | 39311                                | 298                        | 5     | 69/10 | 70       | 27       | 43        | 12.8     | 2       | 3.2       | 1.8        | 0.59         |                     | 8/9/04 @UCH                             | 805                        | 2.81 |
| 9  | N                                      | 39311                                | 557                        | 5     | 69/10 | 70       | 27       | 43        | 12.8     | 2       | 3.2       | 1.8        | 0.59         |                     | 8/9/04 @UCH                             | 1660                       | 2.81 |
| 10 | N                                      | 38252                                | 835                        | 14    | 90/10 | 99       | 43       | 65        | 9        | 8       | 6.33      | 3.4        | 0.5          |                     | 1/25/2007 @UCH                          | 22                         | 1.8  |
| 11 | N                                      | 38252                                | 2515                       | 14    | 90/10 | 99       | 43       | 65        | 9        | 8       | 6.33      | 3.4        | 0.5          |                     | 3/23/12 @UCH                            | 224                        | 1.99 |
| 12 | Y (INO)                                |                                      |                            |       |       |          |          |           |          |         |           |            |              |                     | 38930                                   | 211                        | 4.07 |
| 13 | Y (INO)                                |                                      |                            |       |       |          |          |           |          |         |           |            |              |                     | 38930                                   | 536                        | 4.07 |
| 14 | N (PGI2); Borderline (oral Nifedipine) | 39728                                | 524                        | 6     | 72/3  | 71       | 30       | 46        | 9.5      | 15      | 3.47      | 1.73       | 0.682        | N/A                 | 39204                                   | 0                          | 1.96 |
| 15 | N (PGI2); Borderline (oral Nifedipine) | 39728                                | 526                        | 6     | 72/3  | 71       | 30       | 46        | 9.5      | 15      | 3.47      | 1.73       | 0.682        | N/A                 | 12/1/09 @NJH                            | 106                        | 1.6  |
| 16 | N (by current standards)               |                                      |                            |       |       |          |          |           |          |         |           |            |              |                     | 10/29/07 @UCH                           | 191                        | 2.52 |

|    | AN                       | AO    | AP   | AQ   | AR         | AS     | AT     | AU     | AV         | AW    | AX         | AY         | AZ       | BA                                                      | BB                                                              | BC   | BD   |
|----|--------------------------|-------|------|------|------------|--------|--------|--------|------------|-------|------------|------------|----------|---------------------------------------------------------|-----------------------------------------------------------------|------|------|
| 17 | N (by current standards) | 41016 | 0    | 2; 7 | 36/1       | 36; 45 | 13; 15 | 22; 26 | 3.13; 2.66 | 6; 11 | 5.11; 5.63 | 3.13; 3.45 | 0.71     | 2 numbers are BL and post-fluid challenge (300cc IV NS) | 5/11/09 @UCH                                                    | 1072 | 2.11 |
| 18 |                          | 38261 | 1300 | 8    | 104/13     | 106    | 50     | 74     | 29.1       | 9     | 2.4        | 1.44       | 0.63     |                                                         | 39497                                                           | 64   | 3.61 |
| 19 |                          | 41437 | 0    | 8    | 100/4      | 102    | 50     | 73     | 10.61      | 9     | 6.03       | 3.47       | 0.6      | N/A                                                     | 6/12/13 @UCH                                                    | 0    | 3.15 |
| 20 | N                        |       |      |      |            | 102    | 48     | 65; 48 | 5          | 48?   | 3.4        |            |          | Y                                                       | 37924                                                           | 1450 | 2.91 |
| 21 | N                        | 40358 | 811  | 7    | 87/10      | 79     | 39     | 56     | 12.84      | 13    | 3.35       | 1.68       | 0.63     |                                                         | 5/19/10 @UCH                                                    | 770  | 3.15 |
| 22 | N (PGI2)                 |       |      |      |            |        |        |        |            |       |            |            |          |                                                         | no PFTs in e-record                                             |      |      |
| 23 | N (PGI2)                 |       |      |      |            |        |        |        |            |       |            |            |          |                                                         | no PFTs in e-record                                             |      |      |
| 24 | N                        |       |      |      |            |        |        |        |            |       |            |            |          |                                                         | 2/18/2008 @Centura Health                                       | 86   | 3.08 |
| 25 | N                        | 40576 | 0    | 11   | 81/4       | 81     | 34     | 51     | 11.19      | 2     | 4.38       | 2.65       | 0.52     | N/A                                                     | 11/10/10 @UCH                                                   | 84   | 3.08 |
| 26 | N (iNO); Y (O2)          |       |      |      |            |        |        |        |            |       |            |            |          |                                                         | 39752                                                           | 111  |      |
| 27 | N (iNO); Y (O2)          |       |      |      |            |        |        |        |            |       |            |            |          |                                                         | 39752                                                           | 208  |      |
| 28 | N (iNO)                  | 39881 | 100  | 7; 3 | 85/7       | 91; 76 | 51; 34 | 67; 49 | 30.5; 25   | 12; 6 | 1.8; 1.63  | 1.26; 1.14 | 57%; 72% | N (iNO)                                                 | No PFTs in e-record                                             |      |      |
| 29 | N (iNO)                  | 41788 | 0    | 4; 3 | 98/3; 89/1 | 98; 84 | 47; 40 | 67; 58 | 16.22      | 7     | 3.7        | 2.57       | 86%; 72% | N (2 #'s are BL and 100% O2)                            | No PFTs in e-record                                             |      |      |
| 30 | Y? (iNO)                 |       |      |      |            |        |        |        |            |       |            |            |          |                                                         | 9/1/06, but not in e-record; noted "normal" except reduced DLCO | 1081 |      |
| 31 | Y? (iNO)                 |       |      |      |            |        |        |        |            |       |            |            |          |                                                         | 9/1/06, but not in e-record; noted "normal" except reduced DLCO |      |      |
| 32 | N (iNO)                  | 40157 | 0    | 5    | 93/4       | 93     | 34     | 53     | 12         | 5     | 3.97       | 1.95       | 0.52     |                                                         | 8/11/2006 (@PSL?)                                               | 1217 | 2.08 |
| 33 | N (iNO)                  | 40157 | 125  | 5    | 93/4       | 93     | 34     | 53     | 12         | 5     | 3.97       | 1.95       | 0.52     |                                                         | 8/11/2006 (@PSL?)                                               | 1342 | 2.08 |

|    | AN                                                              | AO    | AP  | AQ   | AR      | AS     | AT     | AU     | AV         | AW    | AX          | AY         | AZ       | BA                                            | BB                                         | BC   | BD   |
|----|-----------------------------------------------------------------|-------|-----|------|---------|--------|--------|--------|------------|-------|-------------|------------|----------|-----------------------------------------------|--------------------------------------------|------|------|
| 34 | N (*NOTE: numbers are RA, 6L/min O2, and iNO, respectively)     |       |     |      |         |        |        |        |            |       |             |            |          |                                               | 1/8/10 @UCH                                | 48   | 3.48 |
| 35 | N (*NOTE: numbers are RA, 6L/min O2, and iNO, respectively)     |       |     |      |         |        |        |        |            |       |             |            |          |                                               | 3/23/12 @NJH                               | 82   | 2.66 |
| 36 | Questionable resp. to Nitroprusside; systemic pressures dropped |       |     |      |         |        |        |        |            |       |             |            |          |                                               | 8/17/2010 @ Rapid City Regional Hosp in SD | 35   | 3.44 |
| 37 | Questionable resp. to Nitroprusside; systemic pressures dropped | 41208 | 0   |      | 246/0   | 46     | 19     | 30     | 5.59       | 11    | 3.4         | 2.17       | 0.7      | ND                                            | 8/17/2010 @ Rapid City Regional Hosp in SD | 801  | 3.44 |
| 38 |                                                                 | 41934 | 0   |      | 684/9   | 78     | 32     | 50     | 11.53      | 13    | 3.21        | 1.79       | 0.65     |                                               | 3/27/11 @UCH (most recent PFT in Epic)     | 1305 | 3.11 |
| 39 |                                                                 | 41934 | 84  |      | 684/9   | 78     | 32     | 50     | 11.53      | 13    | 3.21        | 1.79       | 0.65     |                                               | 3/27/11 @UCH (most recent PFT in Epic)     | 1389 | 3.11 |
| 40 | N (iNO)                                                         |       |     |      |         |        |        |        |            |       |             |            |          |                                               | 10/25/11 @UCH                              | 9    | 2.11 |
| 41 | N (iNO)                                                         | 41739 | 0   |      | 1281/0  | 86     | 33     | 51     | 14.24      | 5     | 3.23        | 1.89       |          | N/A                                           | 4/24/2013 @UCH                             | 14   | 2.16 |
| 42 | N (iNO)                                                         |       |     |      |         |        |        |        |            |       |             |            |          |                                               | 2/13/12 @UCH                               | 1    | 1.92 |
| 43 | N (iNO)                                                         | 41925 | 201 | 3; 3 | 62/2    | 58; 51 | 21; 16 | 36; 31 | 5.73; 5.07 | 8; 8  | 4.89; 4.54  | 2.7; 2.51  | 0.76     | N (iNO)                                       | 3/26/14 @UCH                               | 0    | 1.73 |
| 44 | N (iNO)                                                         |       |     |      |         |        |        |        |            |       |             |            |          |                                               | 11/2/10 @Parkview MC, Pueblo               | 489  | 3.21 |
| 45 | N (iNO)                                                         |       |     |      |         |        |        |        |            |       |             |            |          |                                               | 11/2/10 @Parkview MC, Pueblo               | 1462 | 3.21 |
| 46 |                                                                 | 40990 | 0   | 3; 5 | 64/1    | 61; 82 | 23; 32 | 37; 51 | 4.86; 8.1  | 5; 5  | 6.59; 5.68  | 3.17; 2.73 | 63%; 61% | Y (2 numbers are w/ and w/o epop @2ng/kg/min) | PFT?                                       |      |      |
| 47 |                                                                 | 41074 | 0   | 3; 4 | 85/-2   | 85; 69 | 24; 18 | 51; 32 | 4.2; 2.36  | 8; 10 | 10.25; 9.32 | 4.93; 4.48 | 59%; 73% | Y (iNO)                                       | PFT?                                       |      |      |
| 48 | N (iNO)                                                         |       |     |      |         |        |        |        |            |       |             |            |          |                                               | 11/8/12 @UCH                               | 118  | 1.53 |
| 49 | N (iNO)                                                         |       |     |      |         |        |        |        |            |       |             |            |          |                                               | 11/8/12 @UCH                               | 426  | 1.53 |
| 50 | N (iNO)                                                         | 41424 | 57  |      | 1579/10 | 80     | 30     | 50     | 10.7       | 9     | 3.83        | 2.39       | 0.55     |                                               | 5/15/13 @UCH                               | 42   | 1.91 |

|    | AN      | AO    | AP  | AQ     | AR    | AS     | AT     | AU     | AV             | AW     | AX         | AY         | AZ       | BA      | BB           | BC  | BD   |
|----|---------|-------|-----|--------|-------|--------|--------|--------|----------------|--------|------------|------------|----------|---------|--------------|-----|------|
| 51 | N (iNO) | 41424 | 370 | 15     | 79/10 | 80     | 30     | 50     | 10.7           | 9      | 3.83       | 2.39       | 0.55     |         | 5/15/13 @UCH | 385 | 1.91 |
| 52 |         | 41508 | 22  | 8; 7   | 72/4  | 69; 64 | 28; 26 | 43; 41 | 11.52;<br>8.33 | 8; 10  | 4.37; 3.72 | 2.77; 2.35 | 67%; 66% | N (iNO) | 9/17/14 @UCH | 413 | 2.46 |
| 53 |         | 41508 | 0   | 8; 7   | 72/4  | 69; 64 | 28; 26 | 43; 41 | 11.52;<br>8.33 | 8; 10  | 4.37; 3.72 | 2.77; 2.35 | 67%; 66% | N (iNO) | 9/17/14 @UCH | 391 | 2.46 |
| 54 |         | 41844 | 0   | 14; 11 | 56/4  | 63; 54 | 23; 25 | 43; 38 | 8.17; 5.86     | 14; 15 | 3.55; 3.91 | 1.68; 1.85 | 59%; 66% | N (iNO) | 1/2/15 @UCH  |     | 2.79 |
| 55 | N (iNO) | 42026 | 1   | 9; 6   | 50/2  | 50; 48 | 25; 21 | 36; 35 | 5.15; 6.12     | 15; 12 | 4.08; 3.76 | 1.97; 1.82 | 64%; 68% | N (iNO) | 1/2/15 @UCH  | 19  | 2.79 |

|    | BE          | BF   | BG           | BH         | BI   | BJ          | BK   | BL         | BM    | BN            | BO        | BP        | BQ         | BR                    | BS    | BT                                                                   | BU                        | BV         |
|----|-------------|------|--------------|------------|------|-------------|------|------------|-------|---------------|-----------|-----------|------------|-----------------------|-------|----------------------------------------------------------------------|---------------------------|------------|
| 1  | FVC % Pred. | FEV1 | FEV1 % Pred. | FEV1 / FVC | TLC  | TLC % Pred. | RV   | RV % Pred. | DILCO | DILCO % Pred. | FVC:DILCO | BMI       | DILCO/VA   | Date of Autoimm. Labs | RF    | ANA                                                                  | ACA                       | Anti-dsDNA |
| 2  | 0.59        | 1.51 | 0.57         | 0.79       | 4.18 | 0.85        | 2.27 | 1.34       | 13.6  | 0.53          | 1.113208  |           |            | 1/26/09 unless noted  |       | >1:320 speckled                                                      | strong pos abnormal       | neg        |
| 3  | 0.51        | 1.13 | 0.44         | 0.7        |      | 0.8         |      | 1.29       |       | 0.32          | 1.59375   |           | 64%        | 1/26/09 unless noted  |       | >1:320 speckled                                                      | strong pos abnormal       | neg        |
| 4  |             |      |              |            |      |             |      |            |       |               | #N/A      |           |            | 8/23/03 unless noted  |       | neg                                                                  | neg                       |            |
| 5  |             |      |              |            |      |             |      |            |       |               | #N/A      |           |            | 8/23/03 unless noted  |       | neg                                                                  | neg                       |            |
| 6  |             |      |              |            |      |             |      |            |       |               | #N/A      |           |            | 12/10/01 unless noted | <3    | 1:16 fine speckled 3+; 1:64 fine speckled 2+; 1:256 fine speckled 1+ | neg                       |            |
| 7  |             |      |              |            |      |             |      |            |       |               | #N/A      |           |            | 12/10/01 unless noted | <3    | 1:16 fine speckled 3+; 1:64 fine speckled 2+; 1:256 fine speckled 1+ | neg                       |            |
| 8  | 0.84        | 1.81 | 0.71         | 0.64       | 5.72 | 1.04        | 2.71 | 1.2        | 16    |               | #N/A      |           | 3.76; 76%  |                       |       | pos (1999 per Dr. report)                                            | pos (1999 per Dr. report) |            |
| 9  | 0.84        | 1.81 | 0.71         | 0.64       | 5.72 | 1.04        | 2.71 | 1.2        | 16    |               | #N/A      |           | 3.76; 76%  |                       |       | pos (1999 per Dr. report)                                            | pos (1999 per Dr. report) |            |
| 10 | 0.48        | 1.4  | 0.46         | 0.78       | 3.05 | 0.55        | 1.13 | 0.6        | 13.4  | 0.47          | 1.021277  | 67"; 165# | 4.76; 88%  | 8/6/02 unless noted   | 16.6H | 1:256; fine speckled 3+                                              | neg                       |            |
| 11 | 0.62        | 1.51 | 0.59         | 0.76       | 2.8  | 0.51        | 0.78 | 0.4        | 9.2   | 0.33          | 1.878788  | 67"; 158# | 3.66; 69%  | 8/6/02 unless noted   | 16.6H | 1:256; fine speckled 3+                                              | neg                       |            |
| 12 | 1.01        | 3.21 | 1.03         | 0.79       | 6.74 | 1.16        | 2.77 | 1.27       | 19.62 | 0.76          | 1.328947  |           | ; 76%      | 8/18/06               | <10   | 1/320; mixed speckled, diffuse                                       |                           |            |
| 13 | 1.01        | 3.21 | 1.03         | 0.79       | 6.74 | 1.16        | 2.77 | 1.27       | 19.62 | 0.76          | 1.328947  |           | ; 76%      | 8/18/06               | <10   | 1/320; mixed speckled, diffuse                                       |                           |            |
| 14 | 0.63        | 1.62 | 0.66         | 0.82       | 3.19 | 0.61        | 1.15 | 0.54       | 9.5   | 0.39          | 1.615385  | 65"; 213# | 3.31; 66%  | 2/24/02 unless noted  |       | 1:256 speckled 3+                                                    | neg                       | 13 (neg)   |
| 15 | 0.56        | 1.3  | 0.61         |            |      |             |      |            | 5     | 0.22          | 2.545455  |           |            | 2/24/02 unless noted  |       | 1:256 speckled 3+                                                    | neg                       | 13 (neg)   |
| 16 | 0.81        | 1.94 | 0.76         | 0.77       | 4.02 | 0.82        | 1.34 | 0.74       | 20.9  | 0.84          | 0.964286  | 63"; 154# | 5.63; 107% | 5/7/08                |       |                                                                      |                           |            |

|    | BE   | BF   | BG   | BH   | BI   | BJ   | BK   | BL   | BM   | BN   | BO       | BP        | BQ            | BR                   | BS               | BT                             | BU               | BV  |
|----|------|------|------|------|------|------|------|------|------|------|----------|-----------|---------------|----------------------|------------------|--------------------------------|------------------|-----|
| 17 | 0.69 | 1.7  | 0.68 | 0.81 | 3.64 | 0.74 | 1.38 | 0.75 | 15.5 | 0.63 | 1.095238 | 63"; 150# | 5.82;<br>112% | 5/2/12 unless noted  |                  | neg                            | neg              |     |
| 18 | 1.07 | 2.88 | 0.98 | 0.8  | 5.12 | 1.08 | 1.51 | 1.11 | 16.5 | 0.61 | 1.754098 | 62"; 145# | 3.73; 65%     |                      |                  |                                |                  |     |
| 19 | 0.91 | 2.49 | 0.88 | 0.79 | 4.29 | 0.91 | 1.11 | 0.76 | 16.4 | 0.62 | 1.467742 | 62"; 160# | 4.36; 78%     |                      |                  |                                |                  |     |
| 20 | 0.68 | 1.9  | 0.54 | 0.65 | 5.64 | 0.95 | 2.73 | 1.44 | 13   |      | #N/A     |           | 2.58; 46%     | 1/14/07 unless noted | <10<br>(9/29/05) | neg (4/17/02)                  | neg<br>(4/17/02) |     |
| 21 | 0.7  | 1.97 | 0.55 | 0.62 | 5.27 | 0.87 | 2.12 | 1.03 | 12.9 | 0.41 | 1.707317 | 71"; 160# | 3.0; 55%      | 1/14/07 unless noted | <10<br>(9/29/05) | neg (4/17/02)                  | neg<br>(4/17/02) |     |
| 22 |      |      |      |      |      |      |      |      |      |      | #N/A     |           |               |                      |                  |                                |                  |     |
| 23 |      |      |      |      |      |      |      |      |      |      | #N/A     |           |               |                      |                  |                                |                  |     |
| 24 | 0.99 | 2.45 | 0.98 | 0.8  | 4.85 | 0.96 | 1.75 | 0.88 | 18.8 | 0.76 | 1.302632 | 64"; 188# | 4.35; 86%     | 3/19/08 unless noted | <20              | 1/320 speckled                 | pos<br>abnormal  | neg |
| 25 | 0.95 | 2.22 | 0.89 | 0.72 | 4.6  | 0.91 | 1.52 | 0.74 | 17.2 | 0.71 | 1.338028 | 64"; 142# | 4.36; 87%     | 1/29/11 unless noted | <20              | 1:320 speckled                 | pos<br>abnormal  | neg |
| 26 |      |      | 0.72 | 0.66 | 4.29 | 0.8  |      |      |      | 0.61 |          |           |               | 11/4/08              | neg              | 1:320; anti-centromere pattern | neg              |     |
| 27 |      |      | 0.72 | 0.66 | 4.29 | 0.8  |      |      |      | 0.61 |          |           |               | 11/4/08              | neg              | 1:320; anti-centromere pattern | neg              |     |
| 28 |      |      |      |      |      |      |      |      |      |      | #N/A     |           |               | 6/1/11 unless noted  | 14               | 1:320 Fine speckled            | neg              |     |
| 29 |      |      |      |      |      |      |      |      |      |      | #N/A     |           |               | 6/1/11 unless noted  | 14               | 1:320 Fine speckled            | neg              |     |
| 30 |      |      |      |      |      |      |      |      |      |      | #N/A     |           |               | 8/17/09 unless noted |                  | 1:320; speckled                | neg              |     |
| 31 |      |      |      |      |      |      |      |      |      |      | #N/A     |           |               | 2/23/15 unless noted | <10              | 1:160; fine speckled           | neg              |     |
| 32 | 0.6  | 1.62 | 0.56 | 0.78 | 4.12 | 0.81 | 2.04 | 1.22 |      |      | #N/A     |           |               | 8/7/06 unless noted  | neg              | neg                            | neg              |     |
| 33 | 0.6  | 1.62 | 0.56 | 0.78 | 4.12 | 0.81 | 2.04 | 1.22 |      |      | #N/A     |           |               | 8/7/06 unless noted  | neg              | neg                            | neg              |     |

|    | BE   | BF   | BG   | BH       | BI       | BJ   | BK       | BL   | BM    | BN   | BO       | BP        | BQ        | BR                    | BS                             | BT                                   | BU             | BV             |
|----|------|------|------|----------|----------|------|----------|------|-------|------|----------|-----------|-----------|-----------------------|--------------------------------|--------------------------------------|----------------|----------------|
| 34 | 0.96 | 2.78 | 0.92 | 0.8      | 4.82     | 0.91 | 1.34     | 0.81 | 11    | 0.4  | 2.4      | 62"; 123# | 3.15; 60% | 2/3/10 unless noted   |                                | >1:320 speckled nucleolar (1/6/2010) | neg (1/6/2010) | neg            |
| 35 | 0.75 | 2.16 | 0.86 |          | 4.37     | 0.94 |          |      | 13.32 | 0.5  | 1.5      |           | 3.29; 63% | 2/3/10 unless noted   |                                | >1:320 speckled nucleolar (1/6/2010) | neg (1/6/2010) | neg (2/8/10)   |
| 36 | 0.88 | 2.81 | 0.86 | "normal" | "normal" |      | "normal" |      |       | 0.65 | 1.353846 |           |           | 9/8/10 unless noted   | 6.3 (8/15/10)                  | neg                                  | neg            |                |
| 37 | 0.88 | 2.81 | 0.86 | "normal" | "normal" |      | "normal" |      |       | 0.65 | 1.353846 |           |           | 9/8/10 unless noted   | 6.3 (8/15/10)                  | neg                                  | neg            |                |
| 38 | 0.97 | 2.43 | 0.98 | 0.78     |          |      |          |      |       |      | #N/A     | 29.01     |           | 3/14/11 unless noted  | <20                            | neg                                  | neg            |                |
| 39 | 0.97 | 2.43 | 0.98 | 0.78     |          |      |          |      |       |      | #N/A     | 29.01     |           | 6/25/15 unless noted  | <20 (3/14/11)                  | neg                                  | neg            |                |
| 40 | 0.69 | 1.5  | 0.62 | 0.71     |          |      |          |      |       |      | #N/A     |           |           | 2/4/02 unless noted   | <3                             | 1:256; speckled 4+                   | neg            | neg            |
| 41 | 0.73 | 1.56 | 0.67 | 0.72     |          |      |          |      | 5.5   | 0.21 | 3.47619  |           | 1.97; 38% | 6/6/12 unless noted   | <3 (2/4/02)                    | 1:256; speckled 4+ (2/4/02)          | neg (2/4/02)   | neg            |
| 42 | 0.69 | 1.45 | 0.69 | 0.76     | 3.41     | 0.7  | 1.49     | 0.68 | 6.4   | 0.29 | 2.37931  | 63"; 177# | 2.83; 59% | 1/23/12 unless noted  | pos on outside testing (date?) | >1:320; speckled, nucleolar          | neg            | neg            |
| 43 | 0.61 | 1.28 | 0.6  | 0.74     | 3.48     | 0.68 | 1.55     | 0.67 | 6.6   | 0.29 | 2.103448 | 64"; 166# | 2.76; 59% | 1/23/12 unless noted  | pos on outside testing (date?) | >1:320; speckled, nucleolar          | neg            | neg            |
| 44 | 0.86 | 2.63 | 0.82 | 0.82     | 4.61     | 0.86 | 1.4      | 0.88 | 22    | 0.8  | 1.075    | 65"; 186# | 5.6; 138% | 11/15/10 unless noted | <20                            | neg                                  | neg            | neg (10/20/10) |
| 45 | 0.86 | 2.63 | 0.82 | 0.82     | 4.61     | 0.86 | 1.4      | 0.88 | 22    | 0.8  | 1.075    | 65"; 186# | 5.6; 138% | 11/15/10 unless noted | <20                            | neg                                  | neg            | neg (10/20/10) |
| 46 |      |      |      |          |          |      |          |      |       |      | #N/A     |           |           | 1/20/12 unless noted  |                                | neg (7/11/11)                        | neg (7/11/11)  |                |
| 47 |      |      |      |          |          |      |          |      |       |      | #N/A     |           |           | 4/23/12 unless noted  |                                | neg (7/11/11)                        | neg (7/11/11)  |                |
| 48 | 0.73 | 1.46 | 0.89 | 0.95     | 5.68     | 1.12 | 2.22     | 0.94 | 8.4   | 0.38 | 1.921053 | 64"; 178# | 2.58; 56% | 2/6/13 unless noted   | 11                             | >1:320; speckled                     | pos            | neg            |
| 49 | 0.73 | 1.46 | 0.89 | 0.95     | 5.68     | 1.12 | 2.22     | 0.94 | 8.4   | 0.38 | 1.921053 | 64"; 178# | 2.58; 56% | 4/15/13 unless noted  | 11 (2/6/13)                    | >1:320; speckled                     | pos            | neg            |
| 50 | 0.62 | 1.53 | 0.61 | 0.8      | 3.24     | 0.73 | 1.29     | 0.85 | 10.7  | 0.45 | 1.37778  | 60"; 137# | 4.07; 75% | 2/9/11 unless noted   | <20                            | neg                                  | neg            |                |

|    | BE   | BF   | BG   | BH   | BI   | BJ   | BK   | BL   | BM   | BN   | BO       | BP        | BQ        | BR                  | BS  | BT  | BU  | BV  |
|----|------|------|------|------|------|------|------|------|------|------|----------|-----------|-----------|---------------------|-----|-----|-----|-----|
| 51 | 0.62 | 1.53 | 0.61 | 0.8  | 3.24 | 0.73 | 1.29 | 0.85 | 10.7 | 0.45 | 1.377778 | 60"; 137# | 4.07; 75% | 2/9/11 unless noted | <20 | neg | neg |     |
| 52 | 0.9  | 1.63 | 0.79 | 0.66 | 4.57 | 1.01 | 2.03 | 1.05 | 10.1 | 0.47 | 1.914894 | 61"; 138# | 2.95; 60% | 7/3/13 unless noted | neg | neg | neg | neg |
| 53 | 0.9  | 1.63 | 0.79 | 0.66 | 4.57 | 1.01 | 2.03 | 1.05 | 10.1 | 0.47 | 1.914894 | 61"; 138# | 2.95; 60% | 7/3/13 unless noted | neg | neg | neg | neg |
| 54 | 0.65 | 1.44 | 0.41 | 0.52 | 4.91 | 0.71 | 2.05 | 1.12 | 13.4 | 0.35 | 1.857143 | 70"; 206# | 3.19; 56% | 3/2/14 unless noted | <10 | neg | neg | neg |
| 55 | 0.65 | 1.44 | 0.41 | 0.52 | 4.91 | 0.71 | 2.05 | 1.12 | 13.4 | 0.35 | 1.857143 | 70"; 206# | 3.19; 56% | 3/2/14 unless noted | <10 | neg | neg | neg |



|    | BW                          | BX       | BY                                                                                                     | BZ           | CA             | CB                    | CC                 | CD               | CE              | CF                      | CG             | CH        | CI        | CJ             | CK                |
|----|-----------------------------|----------|--------------------------------------------------------------------------------------------------------|--------------|----------------|-----------------------|--------------------|------------------|-----------------|-------------------------|----------------|-----------|-----------|----------------|-------------------|
| 1  | Anti-Topoisomerase (Scl-70) | Anti-RNP | Other Antibodies                                                                                       | ESR          | CRP            | Date CBC, BMP, LFT    | Creatinine (mg/dL) | Troponin (ng/mL) | BNP (pg/mL)     | GFR (mL/min/1.73 sq. m) | Alk Phos (U/L) | AST (U/L) | ALT (U/L) | Albumin (g/dL) | Bilirubin (mg/dL) |
| 2  | neg                         | neg      |                                                                                                        | 4 (9/17/08)  | 3.6 (9/17/08)  | 8/23/06 unless noted  | 1.1                | .05 (7/14/07)    | 126H            | >60                     | 52             | 19        | 19        | 4              | 0.9               |
| 3  | neg                         | neg      |                                                                                                        | 4 (9/17/08)  | 3.6H (9/17/08) | 3/25/09 unless noted  | 0.98               | 0.06H (3/6/09)   | 1106H           | >60                     | 87             | 22        | 14        | 3.4            | 1.1               |
| 4  | neg                         |          |                                                                                                        |              |                | 10/17/06 unless noted | 1                  | (8/21/03)        | 50 (8/21/03)    |                         | 57             | 26        | 16        | 4.3            | 0.7               |
| 5  | neg                         |          |                                                                                                        |              |                | 1/20/09 unless noted  | 1.05               | (12/3/09)        | 34 (7/8/09)     |                         | 54             | 18        | 15        | 3.8            | 0.7               |
| 6  |                             |          |                                                                                                        | 12 (3/16/05) | 1.5 (3/16/05)  | 10/23/06 unless noted | 0.7                | 0.02 (11/2/07)   | 169H            | >60                     | 54             | 20        | 13        | 4.1            | 0.9               |
| 7  |                             |          |                                                                                                        | 12 (3/16/05) | 1.5 (3/16/05)  | 1/12/09 unless noted  | 1                  | .03 (3/13/08)    | 125H            | >60                     | 53             | 18        | 11        | 3.9            | 0.5               |
| 8  |                             |          |                                                                                                        | 4 (10/23/06) | 0.2 (5/1/07)   | 10/23/06 unless noted | 1                  |                  | 716H            | 59                      | 70             | 31        | 16        | 3.3L           | 0.7               |
| 9  |                             |          |                                                                                                        | 4 (10/23/06) | 0.2 (5/1/07)   | 2/11/09 unless noted  | 1                  |                  | 1709H (1/6/09)  | >60                     | 74             | 26        | 10L       | 4.2            | 1.3               |
| 10 |                             |          |                                                                                                        | 16; 7        |                | 1/3/07 unless noted   | 0.8                | 0.03 (10/04)     | 29              | >60                     | 128H           | 19        | 14        | 4.1            | 1.3H              |
| 11 |                             |          |                                                                                                        |              |                | 8/12/11 unless noted  | 0.81               | 0.03 (10/04)     | 60 (2/8/11)     | >60                     | 91             | 27        | 19        | 4              | 1.5H              |
| 12 | neg                         |          |                                                                                                        | 3            |                | 6/6/07 unless noted   | 0.8                | (11/16/06)       | 126H (10/11/06) | >60                     | 40             | 35        | 31        | 4.1            | 0.9               |
| 13 | neg                         |          |                                                                                                        | 3            |                | 1/9/08 unless noted   | 0.8                | (11/1/07)        | 217H            | >60                     | 43             | 26        | 24        | 3.8            | 0.8               |
| 14 | neg                         | neg      | a-SSA, RVVT both pos                                                                                   | 13 (4/24/09) | 3.2H (4/24/09) | 5/2/07 unless noted   | 0.8                | 0.05 (4/24/09)   | 193H            | >60                     | 130H           | 22        | 13        | 3.8            | 0.5               |
| 15 | neg                         | neg      | a-Smith, SSB, B2GP, ACLA, C3c/C4 all neg; a-SSA pos, RVVT=39.3H (2/24/02); a-IgE receptor NL (1/26/09) | 13 (4/24/09) | 3.2H (4/24/09) | 3/10/10 unless noted  | 1.34H              | 0.05 (4/24/09)   | 2092H           | 39                      | 140H           | 23        | 16        | 3.6            | 1.1               |
| 16 |                             |          |                                                                                                        | 13           | 0.6            | 5/7/08 unless noted   | 1.2                |                  | 56              | 50                      | 57             | 28        | 23        | 3.1L           | 0.4               |

|    | BW           | BX  | BY                                         | BZ          | CA                                 | CB                    | CC              | CD              | CE             | CF  | CG                             | CH            | CI            | CJ             | CK             |     |
|----|--------------|-----|--------------------------------------------|-------------|------------------------------------|-----------------------|-----------------|-----------------|----------------|-----|--------------------------------|---------------|---------------|----------------|----------------|-----|
| 17 |              |     | C3c complement NL, C4 complement = 59.5(H) | 9 (7/20/10) | 0.119 (high sensitivity) (7/20/10) | 4/17/12 unless noted  | 1.03            |                 | 61 (4/14/12)   |     | 61 (10/31/11)<br>55 (10/31/11) | 21 (10/31/11) | 17 (10/31/11) | 2.6L (4/11/12) | 0.6 (10/31/11) |     |
| 18 |              |     |                                            |             |                                    | 5/12/08 unless noted  | 0.9             | 0.02 (11/9/06)  | 112H (1/28/08) | >60 | 60                             | 30            | 34            | 4              | 0.8            |     |
| 19 |              |     |                                            |             |                                    | 6/11/13 unless noted  | 1.22H (6/12/13) | 0.02 (11/9/06)  | 289H (4/24/13) |     | 49 (6/12/13)                   | 60            | 22            | 19             | 4.4 1.4H       |     |
| 20 |              |     |                                            | 8           | <0.5                               | 10/19/07 unless noted | 0.9             | 0.03 (8/30/07)  | 127H           | >60 | 34L                            | 18            | 15            | 4.1            | 0.7            |     |
| 21 |              |     |                                            | 8           | <0.5                               | 4/9/08 unless noted   | 0.8             | 1.18R (4/28/08) | 286H           | >60 | 38L                            | 15            | 14            | 4.1            | 0.5            |     |
| 22 |              |     |                                            |             |                                    | 3/21/08 unless noted  | 1.1             |                 |                | >60 | 98                             | 19            | 21            | 4.6            | 1              |     |
| 23 |              |     |                                            |             |                                    | 1/21/09 unless noted  | 1.1             |                 |                | >60 | 94                             | 27            | 27            | 4.8            | 1              |     |
| 24 | neg          | neg | All neg: a-SSA, A-SSB, a-ISM               | 6 (8/13/08) | 0.8                                | 5/14/08 unless noted  | 1.1             |                 | 438H           | 54  | 69                             | 25            | 30            | 4.1            | 1.3            |     |
| 25 | neg          | neg | All neg: a-SSA, A-SSB, a-CCP, a-ISM        | 6 (8/13/08) | <0.5                               | 2/2/11 unless noted   | 1.09            | 0.02            | 562H (1/23/11) | 51  | 99                             | 14            | 14            | 3.4            | 1.3            |     |
| 26 | neg          |     |                                            | 10          |                                    | 2/4/09 unless noted   | 1.1             |                 | 1161H          |     | 102                            | 47            | 33            | 4.1            | 2.2H           |     |
| 27 | neg          |     |                                            | 10          |                                    | 5/27/09 unless noted  | 0.97            |                 | 346H           | >60 | 82                             | 34            | 20            | 3.7            | 1.5H           |     |
| 28 |              |     |                                            | 5           |                                    | 6/17/09 unless noted  | 0.75            | 0.03 (3/7/09)   | 102H           | >60 | 99                             | 33            | 37            | 4.5            | 0.8            |     |
| 29 |              |     |                                            | 5           |                                    | 5/28/14 unless noted  | 0.77            |                 |                | 16  | >60                            | 67            | 13            | 8              | 4.9            | 0.5 |
| 30 | neg (9/1/06) |     |                                            |             |                                    | 8/17/09 unless noted  | 1.1 (12/11/06)  |                 | 157H (9/1/06)  |     | 94                             | 33            | 30            | 4.3            | 0.9            |     |
| 31 | neg (9/1/06) |     | ACCP=29H                                   |             |                                    | 6/15/15 unless noted  | 1.48H           |                 | 1323H          | 36L | 97 (5/21/15)                   | 84H (5/21/15) | 77H (5/21/15) | 4.2 (5/21/15)  | 0.7 (5/21/15)  |     |
| 32 | neg          |     |                                            |             |                                    | 11/11/09 unless noted | 0.96 (12/10/09) |                 | 365H           | >60 | 74                             | 26            | 21            | 3.9            | 0.9            |     |
| 33 | neg          |     |                                            |             |                                    | 4/14/10 unless noted  | 0.72            |                 | 435H           | >60 | 71                             | 18            | 14            | 4              | 1.2            |     |

|    | BW                     | BX                | BY                                                                                | BZ                | CA                  | CB                     | CC    | CD                 | CE              | CF     | CG                | CH               | CI               | CJ                | CK                |
|----|------------------------|-------------------|-----------------------------------------------------------------------------------|-------------------|---------------------|------------------------|-------|--------------------|-----------------|--------|-------------------|------------------|------------------|-------------------|-------------------|
| 34 | neg                    | neg               |                                                                                   |                   |                     | 2/25/10 unless noted   | 0.89  |                    |                 | >60    | 100<br>(1/6/2010) | 27<br>(1/6/2010) | 20<br>(1/6/2010) | 3.9<br>(1/6/2010) | 1.1<br>(1/6/2010) |
| 35 | neg                    | neg               | D-dimer 460 (high normal)<br>(2/22/11)                                            |                   |                     | 11/30/11 unless noted  | 1.19  |                    | 60 (8/31/11)    | >60    | 87                | 23               | 13               | 4.4               | 1                 |
| 36 |                        |                   |                                                                                   | 3<br>(8/17/10)    | 1.1H                | 9/21/10 unless noted   | 0.79  |                    | 32 (9/8/10)     | >60    | 50                | 17               | 11               | 3.7               | 0.9               |
| 37 |                        |                   |                                                                                   | 3<br>(8/17/10)    | 1.1H                | 10/26/12 unless noted  | 0.94  |                    | 25 (8/10/12)    | >60    | 48 (8/17/11)      | 12<br>(8/17/11)  | 17<br>(8/17/11)  | 4.1<br>(8/17/11)  | 0.4<br>(8/17/11)  |
| 38 |                        |                   |                                                                                   |                   | 7                   | 10/22/14 unless noted  | 0.92  |                    | 43 (9/23/14)    | >60    | 77 (9/23/14)      | 21<br>(9/23/14)  | 18<br>(9/23/14)  | 4.3<br>(9/23/14)  | 0.5<br>(9/23/14)  |
| 39 |                        | neg               | a-Smith, a-Mi2, a-JO1 all neg                                                     | 7<br>(3/14/11)    |                     | 1/14/15 unless noted   | 0.85  |                    |                 | 45 >60 | 63                | 15               | 15               | 4.1               | 0.4               |
| 40 | neg                    | neg               | a-Smith, SSA, SSB, ACLA IgG<br>& IgM all neg                                      | 40H<br>(11/19/11) | 1.4H<br>(11/19/11)  | 11/1-3/11 unless noted | 1.87H | 0.02<br>(11/18/11) |                 | 34L    | 225H              | 23               | 14               | 3.6               | 1.5H              |
| 41 | neg                    | neg               | CANCA/PANCA, a-Smith,<br>SSA, SSB, ACLA IgG & IgM all<br>neg; a-mito neg (6/9/12) | 40H<br>(11/19/11) | 1.4H<br>(11/19/11)  | 4/10/14 unless noted   | 1.51H | 0.02<br>(1/23/14)  | 1116H (1/23/14) | 43L    | 101<br>(2/19/14)  | 17<br>(2/19/14)  | 9 (2/19/14)      | 3.9<br>(2/19/14)  | 1.0<br>(2/19/14)  |
| 42 | neg                    | neg               | a-SM, SSA, SSB, a-mitochon<br>all neg                                             | 60H               | 0.9                 | 2/14/12 unless noted   | 0.86  |                    | 274H (1/23/12)  |        | 72 (1/23/12)      | 27<br>(1/23/12)  | 20<br>(1/23/12)  | 3.6<br>(1/23/12)  | 0.6<br>(1/23/12)  |
| 43 | neg                    | neg               | a-SM, SSA, SSB, a-mitochon<br>all neg                                             | 60H               | 0.9                 | 3/26/14 unless noted   | 1.12  |                    | 125H (6/3/13)   |        | 52                | 79               | 19               | 10                | 4.3               |
| 44 | <1 (neg)<br>(10/20/10) | neg<br>(10/20/10) | a-SM, Sj-SSA/SSB, Proteinase-<br>3, Myeloperoxidase all neg<br>(10/20/10)         |                   | 0.6<br>4 (10/20/10) | 3/5/12 unless noted    | 0.9   |                    | 109H            | >60    | 60<br>(11/15/10)  | 26<br>(11/15/10) | 35<br>(11/15/10) | 4.5<br>(11/15/10) | 1<br>(11/15/10)   |
| 45 | <1 (neg)<br>(10/20/10) | neg<br>(10/20/10) | a-SM, Sj-SSA/SSB, Proteinase-<br>3, Myeloperoxidase all neg<br>(10/20/10)         |                   | 0.6<br>4 (10/20/10) | 11/3/14 unless noted   | 0.91  |                    |                 | 71 >60 | 59                | 14               | 16               | 4.4               | 0.7               |
| 46 |                        |                   | CANCA, PANCA both neg<br>(7/11/11)                                                | 25H               | <0.5                | 3/21/12 unless noted   | 0.65  |                    | 145H (6/15/11)  | >60    | 200H<br>(1/20/12) | 50H<br>(1/20/12) | 36<br>(1/20/12)  | 3.8<br>(1/20/12)  | 0.6<br>(1/20/12)  |
| 47 |                        |                   | CANCA, PANCA both neg<br>(7/11/11); D-dimer 3.88H<br>(5/26/12)                    | 8                 | 1.9H                | 6/14/12 unless noted   | 0.61  | <0.01<br>(5/26/12) | 46 (5/26/12)    | >60    | 289H<br>(5/26/12) | 56H<br>(5/26/12) | 34<br>(5/26/12)  | 4.5<br>(5/26/12)  | 0.6<br>(5/26/12)  |
| 48 |                        | neg               | a-Smith, SSA, SSB all neg<br>(4/15/13); D-dimer=1320H<br>(2/11/09)                | 12                |                     | 3/7/13 unless noted    | 1.01  | 0.05<br>(2/12/09)  | 43 (2/6/13)     |        | 73 (2/6/13)       | 28<br>(2/6/13)   | 26 (2/6/13)      | 3.8<br>(2/6/13)   | 0.4<br>(2/6/13)   |
| 49 |                        | neg               | a-Smith, SSA, SSB all neg<br>(4/15/13); D-dimer=1320H<br>(2/11/09)                | 12<br>(2/6/13)    |                     | 1/8/14 unless noted    | 1.5H  | 0.00<br>(10/17/13) |                 | 38     | 72                | 26               | 23               | 4.2               | 0.6               |
| 50 |                        |                   |                                                                                   | 9                 |                     | 4/3/13 unless noted    | 0.76  |                    | 794H            | >60    | 57 (3/12/13)      | 18<br>(3/12/13)  | 10<br>(3/12/13)  | 3.5<br>(3/12/13)  | 2.1H<br>(3/12/13) |

|    | BW  | BX  | BY                              | BZ | CA | CB                   | CC    | CD | CE                                                 | CF | CG           | CH           | CI           | CJ             | CK             |
|----|-----|-----|---------------------------------|----|----|----------------------|-------|----|----------------------------------------------------|----|--------------|--------------|--------------|----------------|----------------|
| 51 |     |     |                                 | 9  |    | 6/4/14 unless noted  | 1.18  |    | 859H                                               | 49 | 59 (4/23/14) | 19 (4/23/14) | 15 (4/23/14) | 3.9 (4/23/14)  | 2.7H (4/23/14) |
| 52 | neg | neg | a-Smith, SSA, SSB, JO-1 all neg |    |    | 7/31/13 unless noted | 0.99  |    | 649H                                               | 56 | 71           | 30           | 15           | 3.3L           | 1.7H           |
| 53 | neg | neg | a-Smith, SSA, SSB, JO-1 all neg |    |    | 8/22/13 unless noted | 0.99  |    | 649H (7/31/13)                                     | 56 | 71 (7/31/13) | 30 (7/31/13) | 15 (7/31/13) | 3.3L (7/31/13) | 1.7H (7/31/13) |
| 54 | neg | neg | a-Smith, SSA, SSB all neg       |    |    | 7/24/14 unless noted | 1.8H  |    | 213H (6/11/14);<br>[Nt-proBNP =<br>2024H (7/9/14)] | 51 | 104 (7/9/14) | 40H (7/9/14) | 59 (7/9/14)  | 3.2L (7/9/14)  | 1.18H (7/9/14) |
| 55 | neg | neg | a-Smith, SSA, SSB all neg       |    |    | 1/21/15 unless noted | 1.74H |    | 134H                                               | 53 | 69 (4/22/15) | 36 (4/22/15) | 36 (4/22/15) | 4.8 (4/22/15)  | 1.2 (4/22/15)  |

|    | CL            | CM             | CN             | CO              | CP                | CQ                   | CR             | CS              | CT                | CU                 | CV        | CW              | CX                         | CY   | CZ                                                     | DA                         | DB       |
|----|---------------|----------------|----------------|-----------------|-------------------|----------------------|----------------|-----------------|-------------------|--------------------|-----------|-----------------|----------------------------|------|--------------------------------------------------------|----------------------------|----------|
| 1  | BUN (mg/dL)   | NA (mmol/L)    | O2 Sat Art (%) | RDW (%)         | Hemoglobin (g/dL) | WHO Functional Class | DATE WHO Class | DATE 6MWT       | 6 Min WT (meters) | Borg Dyspnea Scale | O2 (L/PM) | ECHO (TTE) Date | Days B/T blood draw & ECHO | RAP4 | Estimated RVSP (mmHg)                                  | TR Jet (Peak Velocity m/s) | RA FXN   |
| 2  | 19            |                | 99% (11/6/03)  |                 | 12.6 (10/6/06)    |                      |                | 38805           | 302               | 5.0                | 3         | 38975           | 23                         | 7    | 55                                                     | 3.464101615                | Sev dil  |
| 3  | 15            |                | 99% (11/6/03)  |                 | 9.3L (3/20/09)    |                      |                |                 |                   |                    |           | 39878           | 19                         | 20   | 131                                                    | 5.267826876                | Sev dil  |
| 4  | 17 (8/28/03)  | 143 (8/28/03)  | 97% (8/28/03)  | 11.6% (8/28/03) | 15.9 (9/07)       | 2                    | 38996          | 38996           | 467               | 3                  | 0         | 38817           | 179                        | 5    | 56                                                     | 3.570714214                | Mod dil  |
| 5  | 14 (11/4/09)  | 142 (12/3/09)  | 100% (12/3/09) | 13.4% (12/3/09) | 15.9 (12/23/08)   | 2                    | 39834          | 40002           | 466               | 3                  | 0         | 39834           | 168                        | 15   | 77 (*may be underestimated due to incomplete envelope) | 3.94                       | Mild dil |
| 6  | 16            |                | 97% (1/03)     |                 | 13.2              | 3                    | 39013          |                 |                   |                    |           | 39098           | 85                         | 5    | 122                                                    | 5.408326913                | Sev dil  |
| 7  | 12            | 140            | 96% (1/22/09)  | 15.3H           | 10.5L             | 3                    | 39835          |                 |                   |                    |           | 39825           | 10                         | 5    | 99                                                     | 4.847679857                | Sev dil  |
| 8  | 13            |                | 91.9% (8/07)   |                 | 14.7              | 2                    | 39013          | 39469           | 274               | 8                  | 4         | 39028           | 15                         | 7    | 75                                                     | 4.123105626                | Mild dil |
| 9  | 19            |                | 91.9% (8/07)   |                 | 12.5              |                      |                |                 |                   |                    |           | 39868           | 0                          | 15   | 109                                                    | 4.847679857                | Sev dil  |
| 10 | 7             | 137            | 90% (9/04)     | 14.7%H          | 15.8              | 2                    |                | 39297           | 350               |                    |           | 39178           | 93                         | 5    | 79                                                     | 4.301162634                | Mod dil  |
| 11 | 14            | 137            | 90% (9/04)     | 15.6%H (2/8/11) | 15.2 (2/8/11)     |                      |                | 40767           | 368               | 1                  | 2?        | 40582           | 185                        | 8    | 84.8                                                   | 4.38178046                 | Mod dil  |
| 12 | 15 (11/16/06) | 137 (11/16/06) | 93% (11/16/06) | 12% (11/16/06)  | 14.1 (11/16/06)   | 2                    | 39456          | 39456           | 494               | 0                  |           | 39141           | 0                          | 5    | 49                                                     | 3.31662479                 | Mod dil  |
| 13 | 17 (3/4/08)   | 138 (3/4/08)   | 93% (11/16/06) | 11.9% (1/3/08)  | 13 (1/3/08)       | 2                    | 39456          | 39456           | 494               | 0                  |           | 39450           | 16                         | 5    | 32                                                     | 2.598076211                | Mild dil |
| 14 | 12            | 141            | 0.98           | 0.12            | 14.1              |                      |                | In a wheelchair |                   |                    |           | 39142           | 62                         | 5    | 73                                                     | 4.123105626                | normal   |
| 15 | 28H           | 135            | 98% (10/7/08)  | 19.3%H          | 14.4              |                      |                | 2/22/11 @NJH    | 83 (in 2 min)     |                    | 8         | 40254           | 0                          | 20   | 117.5                                                  | 4.937104415                | Sev dil  |
| 16 | 19            |                | 93% (7/22/04)  |                 | 15.3 (1/12/09)    |                      |                |                 |                   |                    |           | 39575           | 0                          | 5    | 51                                                     | 3.391164992                | normal   |

|    | CL            | CM                | CN                    | CO                       | CP              | CQ | CR    | CS       | CT                   | CU      | CV | CW                                    | CX  | CY | CZ     | DA          | DB                           |
|----|---------------|-------------------|-----------------------|--------------------------|-----------------|----|-------|----------|----------------------|---------|----|---------------------------------------|-----|----|--------|-------------|------------------------------|
| 17 | 27H           | 134               |                       | 14%<br>1 (4/16/12)       | 15.4 (4/16/12)  |    |       |          |                      |         |    | 41012                                 | 4   | 3  | 28.5   | 2.524876235 | normal                       |
| 18 | 13            | 134               | 88% (10/04)           | 11.7%<br>(2/19/08)       | 17.0H (2/19/08) | 3  | 39561 | 39580    | 270                  | 2       | 6  | 39372                                 | 189 | 10 | 118    | 5.196152423 | Mod dil                      |
| 19 | 16 (6/12/13)  | 137<br>(6/12/13)  |                       | 15.3%H<br>0.78 (6/12/13) | 18.9H (6/12/13) | 3  | 41493 | 41438    | 244                  | 0/5     | 10 | 41436                                 | 1   | 3  | 93.5   | 4.756574398 | Mod dil                      |
| 20 | 11            | 136               |                       |                          | 11.8L           |    |       |          |                      |         |    | 39547                                 | 173 | 10 | 84     | 4.301162634 | Mod dil                      |
| 21 | 11            | 142               | 94% (6/29/10)         |                          | 12.1            |    |       |          |                      |         |    | 39547                                 | 0   | 10 | 84     | 4.301162634 | Mod dil                      |
| 22 | 19            |                   |                       |                          | 14.5            | 3  | 39588 | 12/00/07 | 450                  | ?       | ?  | 4/11/2008 @Kaiser (Dr. Lang)          | 17  | ?  | 80-100 | #N/A        | Sev dil                      |
| 23 | 21            | 138               |                       |                          | 14.4            |    |       | 7/00/09  | 468                  | ?       | ?  | 4/11/2008 @Kaiser (Dr. Lang)          | 943 | ?  | 80-100 | #N/A        | Sev dil                      |
| 24 | 13            | 139               | 92% (3/31/08)         | 13.4%H<br>(3/31/08)      | 16 (3/31/08)    |    |       |          |                      |         |    | 39538                                 | 44  | 10 | 91     | 4.5         | Sev dil                      |
| 25 | 11            | 132L              | 86%; 93%<br>w/100% O2 | 17.7%H                   | 11.5L           | 3  | 40575 | 40443    | 400                  | 4.0     | 0  | 40567                                 | 9   | 15 | 101.9  | 4.661008475 | Sev dil;<br>Mod R-L<br>shunt |
| 26 | 27H           | 142               | 96% (2/19/09)         | 0.125                    | 16.3            |    |       |          | 170 (4',<br>25 sec)  | 0.5; 7? | 2  | 39848                                 | 15  | 10 | 95     | 4.609772229 | Sev dil                      |
| 27 | 24H           | 141               | 96% (2/19/09)         | 12.5%<br>(2/4/09)        | 16.3 (2/4/09)   |    |       |          | 170 (4',<br>25 sec)  | 0.5; 7? | 2  | 39848                                 | 112 | 10 | 95     | 4.609772229 | Sev dil                      |
| 28 | 8             | 140               | 95% (3/9/09)          | 12.7%<br>(3/14/09)       | 17.2H (3/14/09) | 1  | 39981 | 39981    | 364                  | 0       | 0  | 39981                                 | 0   | 5  | 95     | 4.74341649  | Sev dil                      |
| 29 | 8             | 141               | 96% (5/29/14)         | 0.137                    | 14.7            | 1  | 41788 | 41787    | 423                  | 0       | 0  | 41787                                 | 1   | 3  | 53.3   | 3.546124645 | Normal                       |
| 30 | 16 (12/11/06) |                   |                       |                          | 15.1            |    |       | 40042    | 457                  | 0.5     | 0  | 40042                                 | 0   | 5  | 82     | 4.387482194 | normal                       |
| 31 | 25            | 140               |                       |                          | 13.1 (5/21/15)  | 3  | 42170 | 42170    | 390                  | 0       | 2  | 42058                                 | 112 | 15 | 95.2   | 4.477722635 | Sev dil                      |
| 32 | 17 (12/10/09) | 140<br>(12/10/09) | 93% (12/10/09)        | 13.3%<br>(2/3/10)        | 13.7 (2/6/10)   | 3  | 40156 | 40247    | 90 (in 2<br>minutes) | 2       | 2  | 8/14/2009 (Aurora Denver Cardiolog y) | 118 | ?  | 71     | #N/A        | Mild dil                     |
| 33 | 13            | 139               | 93% (12/10/09)        | 12.8%<br>(2/6/10)        | 13.7 (2/6/10)   | 3  | 40156 | 40247    | 90 (in 2<br>minutes) | 2       | 2  | 8/14/2009 (Aurora Denver Cardiolog y) | 243 | ?  | 71     | #N/A        | Mild dil                     |

|    | CL  | CM   | CN                     | CO                  | CP              | CQ | CR    | CS    | CT                                 | CU  | CV | CW                                               | CX  | CY | CZ                                         | DA          | DB                 |
|----|-----|------|------------------------|---------------------|-----------------|----|-------|-------|------------------------------------|-----|----|--------------------------------------------------|-----|----|--------------------------------------------|-------------|--------------------|
| 34 | 15  |      | 98%; 100%              | 0.134               | 14.8            |    |       | 40184 | 323                                | 2.0 | 2  | 40184                                            | 50  | ?  | 110                                        | #N/A        | Mod dil            |
| 35 | 13  | 133  | 98%; 100%<br>(2/25/10) | 14.6%<br>(10/12/11) | 14.2 (10/12/11) | 2  | 41073 | 40786 | 481                                | 3   | 2  | 41073                                            | 0   | 3  | 93.7                                       | 4.76182738  | Mod dil            |
| 36 | 8   | 139  |                        | 0.121               | 13.2            | 3  | 40441 | 40441 | 341                                | 7   | 0  | 0 @<br>Rapid City<br>Regional<br>Hosp in<br>SD @ | 40  | 10 | 74 (rest)/105<br>(w/exercise)              |             | Mild to<br>mod dil |
| 37 | 16  | 135  | 0.98                   | 0.126               | 13.9            | 2  | 41131 | 41131 | 527                                | 3   | 0  | 41043                                            | 165 | 3  | 34.3                                       | 2.797320146 | Normal             |
| 38 | 17  | 132L | 0.94                   | 14.5%H              | 14              | 2  | 41934 | 41311 | 425                                | 1   | 2  | 41905                                            | 29  | 3  | Estimate not poss.<br>d/t incom. TR<br>Env | #N/A        | Normal             |
| 39 | 20  | 137  |                        | 14.5%H              | 12.3            | 2  | 42018 | 42083 | 398                                | 1   | 2  | 41905                                            | 113 | 3  | Estimate not poss.<br>d/t incom. TR<br>Env | #N/A        | normal             |
| 40 | 32H | 142  | 98%; 99%               | 20.6%H              | 14.6            | 3  | 40840 |       |                                    |     |    | 40854                                            | 4   | 3  | 77                                         | 4.301162634 | Mod dil            |
| 41 | 34H | 132L | 98%; 99%<br>(11/3/11)  | 20.6%H              | 12.1            |    |       | 41689 | 210                                | 1   | 4  | 41662                                            | 77  | 15 | 107.6                                      | 4.811444689 | Sev dil            |
| 42 | 10  | 131L |                        | 0.137               | 13.7            | 3  | 40931 | 40996 | 186                                | 7   | 4  | 40931                                            | 22  | 3  | 59                                         | 3.741657387 | Mod dil            |
| 43 | 33H | 138  | 100% (10/13/14)        | 0.149               | 11.7            | 3  | 41724 | 41505 | 235<br>(stopped<br>during<br>walk) | 5   | 4  | 41463                                            | 261 | 3  | 48.7                                       | 3.380088756 | Borderline<br>dil  |
| 44 | 14  | 139  | 94%; 99%<br>(11/24/10) | 14.4%H<br>(6/9/11)  | 12.1 (6/9/11)   | 3  | 40973 | 40973 | 400                                | 3   | 0  | 40973                                            | 0   | 8  | 58.2                                       | 3.542597917 | Mod dil            |
| 45 | 13  | 137  | 94%; 99%<br>(11/24/10) | 14.5%H              | 14.9            | 3  | 41946 | 41946 | 362                                | 3   | 0  | 41946                                            | 0   | 8  | 85.2                                       | 4.393176527 | Sev dil            |
| 46 | 7   | 138  | 95%; 94%               | 25%H                | 8.3L            | 1  | 40989 | 40989 | 475                                | 0.5 | 0  | 40989                                            | 1   | 3  | 47.4                                       | 3.33166625  | Normal             |
| 47 | 10  | 138  | 93%; 100%              | 25%H                | 7.3C            |    |       | 40989 | 475                                | 0.5 | 0  | 41059                                            | 15  | 15 | 73.2                                       | 3.814446225 | Mild dil           |
| 48 | 15  | 141  | 100%; 100%             | 0.131               | 13.1            | 2  | 41340 | 41513 | 262                                | 1   | 0  | 41311                                            | 29  | 3  | 74.5                                       | 4.227883631 | Normal             |
| 49 | 39H | 139  | 100%; 100%<br>(3/7/13) | 13.6%<br>(12/18/13) | 12.3 (12/18/13) | 2  | 41647 | 41513 | 262                                | 1   | 0  | 41435                                            | 212 | 3  | 63.3                                       | 3.882653732 | Normal             |
| 50 | 14  | 141  | 95% (5/30/13)          | 14.9%H<br>(3/19/13) | 11.0L (3/19/13) | 3  | 41367 | 41367 | 271                                | 5.0 | 3  | 41407                                            | 40  | 15 | 85.9                                       | 4.210106887 | Sev dil            |

|    | CL  | CM  | CN                      | CO                 | CP              | CQ  | CR    | CS    | CT  | CU | CV | CW                                 | CX | CY       | CZ      | DA          | DB                |
|----|-----|-----|-------------------------|--------------------|-----------------|-----|-------|-------|-----|----|----|------------------------------------|----|----------|---------|-------------|-------------------|
| 51 | 19  | 138 | 95% (5/30/13)           | 13.9%<br>(4/23/14) | 13.5 (4/23/14)  | 3   | 41794 | 41794 | 354 | 2  | 3  | 41794                              | 0  | 15       | 98.6    | 4.57165178  | Sev dil           |
| 52 | 22  | 142 | 98%; 100%<br>(8/22/13)  | 0.14               | 17.2H           | 2-3 | 41486 | 41486 | 465 | 2  | 0  | 6/13/13<br>@Denver<br>Health<br>MC | 48 | "normal" | 76 +RAP | #N/A        | Mod to<br>Sev Dil |
| 53 | 25H | 139 | 98%; 100%               | 0.137              | 16.4H           | 2   | 41508 | 41507 | 510 | 5  | 0  | 6/13/13<br>@Denver<br>Health<br>MC | 70 | "normal" | 76 +RAP | #N/A        | Mod to<br>Sev Dil |
| 54 | 18  | 139 | 98%; 100%               | 0.139              | 13.7L           | 2   | 41801 | 41801 | 376 | 3  | 2  | 4/29/14<br>@Cheyenne<br>VA         | 86 | 10       | 56      | 3.391164992 | Mild dil          |
| 55 | 18  | 140 | 100%; 100%<br>(1/22/15) | 15.2%<br>(1/22/15) | 12.8L (1/22/15) | 2   | 42025 | 41934 | 392 | 3  | 2  | 42006                              | 19 | 15       | 76.1    | 3.908324449 | Sev dil           |



|    | DC                                       | DD                    |
|----|------------------------------------------|-----------------------|
| 1  | RV Fxn                                   | RV Dilation           |
| 2  | Mild to Mod dil;<br>Mild HoK             | Mild to<br>Moderate   |
| 3  | Mod dil; Mod HoK                         | Moderate              |
| 4  | Mod dil; Mod<br>hypertrophy; Mild<br>HoK | Moderate              |
| 5  | Mod dil; Mild HoK                        | Moderate              |
| 6  | Mod to Sev dil;<br>Severe HoK            | Moderate to<br>Severe |
| 7  | Mod to sev dil; mod<br>HoK               | Moderate to<br>Severe |
| 8  | Mild dil; Mod RVH                        | Mild                  |
| 9  | Sev dil; Mod to Sev<br>HoK               | Severe                |
| 10 | Mild dil; Mod HoK                        | Mild                  |
| 11 | Mild dil; mild HoK                       | Mild                  |
| 12 | Mild dil                                 | Mild                  |
| 13 | Mild dil                                 | Mild                  |
| 14 | Mild HoK; borderline<br>dil              | Borderline<br>dilated |
| 15 | Sev dil; mod HoK                         | Severe                |
| 16 | Normal size and fxn                      | Normal                |

|    | DC                              | DD           |
|----|---------------------------------|--------------|
| 17 | Normal size and fxn             | Normal       |
| 18 | Mild dil; Mild RVH;<br>Mod HoK  | Mild         |
| 19 | Mod dil; mild RVH,<br>mild HoK  | Moderate     |
| 20 | Sev dil; Mild HoK               | Severe       |
| 21 | Sev dil; Mild HoK               | Severe       |
| 22 | Sev dil; severe<br>hypertrophy  | Severe       |
| 23 | Sev dil; severe<br>hypertrophy  | Severe       |
| 24 | Mod dil; Mod<br>systolic dysfxn | Moderate     |
| 25 | Sev dil; mod HoK                | Severe       |
| 26 | "Borderline" dil;<br>mild HoK   | "Borderline" |
| 27 | "Borderline" dil;<br>mild HoK   | "Borderline" |
| 28 | Sev dil; Mod HoK                | Severe       |
| 29 | Mod dil; Mod HoK                | Moderate     |
| 30 | Normal size;<br>borderline HoK  | normal       |
| 31 | Mild dil; mild HoK              | Mild         |
| 32 | Mod dil; good fxn               | Moderate     |
| 33 | Mod dil; good fxn               | Moderate     |

|    | DC                                   | DD       |
|----|--------------------------------------|----------|
|    |                                      |          |
| 34 | Mod dil; Mod HoK                     | Moderate |
|    |                                      |          |
| 35 | Mod dil; Mod HoK                     | Moderate |
|    |                                      |          |
| 36 | Mild dil; some HoK                   | Mild     |
|    |                                      |          |
| 37 | Normal structure and fxn             | Normal   |
|    |                                      |          |
| 38 | Mild dil; Mild HoK                   | Mild     |
|    |                                      |          |
| 39 | Mild dil; Mild HoK                   | Mild     |
|    |                                      |          |
| 40 | Mod dil; Mod HoK                     | Moderate |
|    |                                      |          |
| 41 | Sev dil; Sev HoK                     | Severe   |
|    |                                      |          |
| 42 | Mod dil; mild HoK                    | Moderate |
|    |                                      |          |
| 43 | Normal size and fxn                  | Normal   |
|    |                                      |          |
| 44 | Mod dil; severe HoK                  | Moderate |
|    |                                      |          |
| 45 | Severe dil; moderate systolic dysfxn | Severe   |
|    |                                      |          |
| 46 | Mild dil; normal fxn                 | Mild     |
|    |                                      |          |
| 47 | Mild dil; normal fxn                 | Mild     |
|    |                                      |          |
| 48 | Mild dil; normal fxn                 | Mild     |
|    |                                      |          |
| 49 | Normal size and fxn                  | Normal   |
|    |                                      |          |
| 50 | Sev dil; Sev HoK                     | Severe   |

|    | DC                                                | DD               |
|----|---------------------------------------------------|------------------|
| 51 | Sev dil; Sev HoK                                  | Severe           |
| 52 | Mod to Sev Dil;<br>Mildly reduced<br>systolic fxn | Mod to<br>Severe |
| 53 | Mod to Sev Dil;<br>Mildly reduced<br>systolic fxn | Mod to<br>Severe |
| 54 | Mod dil; mild to<br>mod RV Dysfxn                 | Moderate         |
| 55 | Sev Dil; mild RVH;<br>mod HoK                     | Severe           |
